# Supplementary material
Source: PubMed Central journal article supplement (PMC5931335)
Supplement: NIHMS958395-supplement-Supplemental.pdf [file NIHMS958395-supplement-Supplemental.pdf]

## ***Supplementary Information***

### ***Analysis of O-GlcNAc-modified proteins in murine CD8+ Effector and Memory T cells***

Aime Lopez Aguilar, Yu Gao, Xiaomeng Hou, Gregoire Lauvau, John R. Yates, Peng Wu

#### **Tables**

S1. Complete list and analysis of identified high confidence O-GlcNAcylated proteins

S2. Complete list and analysis of singly identified O-GlcNAcylated proteins

#### **Figures**

S1. Flow cytometry analysis of *in vitro* differentiated T cells.

S2. Comparison between UDP-GalNAz and UDP-GalNAI donors for in solution protein labeling

S3. Protein correlation matrix heatmap.

#### **Materials and Methods**

1. General Methods
2. Mice
3. Bacterial infection
4. T cell isolation and *in vitro* differentiation
5. Flow Cytometry
6. Cell lysis and subcellular fractionation
7. Immunoblotting
8. Histology and O-GlcNAc CHoMP
9. Reagent preparations for chemoenzymatic reactions
  - 9.1. GalT1
  - 9.2 UDP-GalNAI
  - 9.3 UDP-GalNAz
10. Chemoenzymatic O-GlcNAc labelling
11. Proteomics
  - 11.1 Sample preparation
  - 11.2. Proteomics acquisition
  - 11.3. Proteomics data analysis

#### **SI References**

## Tables

### S1. Complete list and analysis of identified high confidence O-GlcNAcylated proteins

Ref = Identification Reference, Phos = Known phosphorylation, Eff = Effector, Mem = Memory, Det = Detected.

| Protein                                                  | Gene     | Group | Ref   | Location  | Phos | Family                  | Pathways                                                                                                                                                                                                                                                                                                                                                                                                                                                                                                                                                                                                                                                                                                                                                                                                                                                                                                                                                                                                                              |
|----------------------------------------------------------|----------|-------|-------|-----------|------|-------------------------|---------------------------------------------------------------------------------------------------------------------------------------------------------------------------------------------------------------------------------------------------------------------------------------------------------------------------------------------------------------------------------------------------------------------------------------------------------------------------------------------------------------------------------------------------------------------------------------------------------------------------------------------------------------------------------------------------------------------------------------------------------------------------------------------------------------------------------------------------------------------------------------------------------------------------------------------------------------------------------------------------------------------------------------|
| Plastin-2                                                | Lcp1     | eff   | -     | Cytoplasm | Y    | other                   | -                                                                                                                                                                                                                                                                                                                                                                                                                                                                                                                                                                                                                                                                                                                                                                                                                                                                                                                                                                                                                                     |
| 40S ribosomal protein S23                                | Rps23    | eff   | 6     | Cytoplasm | Y    | translation regulator   | EIF2 Signaling; mTOR Signaling; Regulation of eIF4 and p70S6K Signaling                                                                                                                                                                                                                                                                                                                                                                                                                                                                                                                                                                                                                                                                                                                                                                                                                                                                                                                                                               |
| Cell division cycle and apoptosis regulator protein 1    | Ccar1    | mem   | 1,6   | Nucleus   | Y    | transcription regulator | -                                                                                                                                                                                                                                                                                                                                                                                                                                                                                                                                                                                                                                                                                                                                                                                                                                                                                                                                                                                                                                     |
| Cathepsin B                                              | Ctsb     | mem   | 6     | Cytoplasm | Y    | peptidase               | autophagy; Inflammasome pathway; Phagosome Maturation                                                                                                                                                                                                                                                                                                                                                                                                                                                                                                                                                                                                                                                                                                                                                                                                                                                                                                                                                                                 |
| Hexokinase-1                                             | Hk1      | mem   | -     | Cytoplasm | -    | kinase                  | GDP-glucose Biosynthesis; Glucose and Glucose-1-phosphate Degradation; Trehalose Degradation II (Trehalase); UDP-N-acetyl-D-galactosamine Biosynthesis II                                                                                                                                                                                                                                                                                                                                                                                                                                                                                                                                                                                                                                                                                                                                                                                                                                                                             |
| E3 ubiquitin-protein ligase HUWE1                        | Huwe1    | mem   | 2,5,6 | Nucleus   | Y    | transcription regulator | -                                                                                                                                                                                                                                                                                                                                                                                                                                                                                                                                                                                                                                                                                                                                                                                                                                                                                                                                                                                                                                     |
| DNA mismatch repair protein Msh6                         | Msh6     | mem   | -     | Nucleus   | Y    | enzyme                  | Colorectal Cancer Metastasis Signaling; Hereditary Breast Cancer Signaling; Mismatch Repair in Eukaryotes; Ovarian Cancer Signaling; Role of BRCA1 in DNA Damage Response                                                                                                                                                                                                                                                                                                                                                                                                                                                                                                                                                                                                                                                                                                                                                                                                                                                             |
| Nuclear pore complex protein Nup214                      | Nup214   | mem   | 1,6   | Nucleus   | Y    | transporter             | -                                                                                                                                                                                                                                                                                                                                                                                                                                                                                                                                                                                                                                                                                                                                                                                                                                                                                                                                                                                                                                     |
| Nucleoporin p58/p45                                      | Nup58    | mem   | 1,4,5 |           | -    |                         | -                                                                                                                                                                                                                                                                                                                                                                                                                                                                                                                                                                                                                                                                                                                                                                                                                                                                                                                                                                                                                                     |
| Phosphatidylinositol-binding clathrin assembly protein   | Picalm   | mem   | 1,5,6 | Cytoplasm | Y    | other                   | Clathrin-mediated Endocytosis Signaling                                                                                                                                                                                                                                                                                                                                                                                                                                                                                                                                                                                                                                                                                                                                                                                                                                                                                                                                                                                               |
| Pleckstrin homology domain-containing, family A member 5 | Plekha5  | mem   | 5     | Cytoplasm | -    | other                   | -                                                                                                                                                                                                                                                                                                                                                                                                                                                                                                                                                                                                                                                                                                                                                                                                                                                                                                                                                                                                                                     |
| Protein phosphatase 1 regulatory subunit 12A             | Ppp1r12a | mem   | 1,5,6 | Cytoplasm | Y    | phosphatase             | 3-phosphoinositide Biosynthesis; 3-phosphoinositide Degradation; Actin Cytoskeleton Signaling; Actin Nucleation by ARP-WASP Complex; Breast Cancer Regulation by Stathmin1; Cardiac $\beta$ -adrenergic Signaling; CCR3 Signaling in Eosinophils; Cdc42 Signaling; CDK5 Signaling; Cellular Effects of Sildenafil (Viagra); Chemokine Signaling; D-myo-inositol (1,4,5,6)-Tetrakisphosphate Biosynthesis; D-myo-inositol (3,4,5,6)-tetrakisphosphate Biosynthesis; D-myo-inositol-5-phosphate Metabolism; Dopamine-DARPP32 Feedback in cAMP Signaling; Dopamine Receptor Signaling; ERK/MAPK Signaling; HIPPO signaling; ILK Signaling; Insulin Receptor Signaling; Integrin Signaling; Phospholipase C Signaling; Production of Nitric Oxide and Reactive Oxygen Species in Macrophages; Protein Kinase A Signaling; Regulation of Actin-based Motility by Rho; RhoA Signaling; RhoGDI Signaling; Signaling by Rho Family GTPases; Superpathway of Inositol Phosphate Compounds; Synaptic Long Term Potentiation; Thrombin Signaling |

|                                                                          |         |     |       |                 |   |                         |                                                                                                                                                                                                                                                                                      |
|--------------------------------------------------------------------------|---------|-----|-------|-----------------|---|-------------------------|--------------------------------------------------------------------------------------------------------------------------------------------------------------------------------------------------------------------------------------------------------------------------------------|
| RNA-binding protein 27                                                   | Rbm27   | mem | 1,5,6 | Nucleus         | Y | other                   | -                                                                                                                                                                                                                                                                                    |
| Deoxynucleoside triphosphate triphosphohydrolase SAMHD1                  | Samhd1  | mem | 6     | Nucleus         | Y | enzyme                  | -                                                                                                                                                                                                                                                                                    |
| SAP30-binding protein                                                    | Sap30bp | mem | 1,5,6 | Nucleus         | Y | transcription regulator | -                                                                                                                                                                                                                                                                                    |
| Splicing factor 1                                                        | Sf1     | mem | 1,6   | Nucleus         | Y | other                   | -                                                                                                                                                                                                                                                                                    |
| Transcription factor Sp1                                                 | Sp1     | mem | 6     | Nucleus         | Y | transcription regulator | Aryl Hydrocarbon Receptor Signaling; ErbB2-ErbB3 Signaling; Estrogen-Dependent Breast Cancer Signaling; Gap Junction Signaling; HMGB1 Signaling; Huntington's Disease Signaling; IL-10 Signaling; Prolactin Signaling; Sumoylation Pathway; Telomerase Signaling; VDR/RXR Activation |
| Spectrin beta chain, non-erythrocytic 1                                  | Sptbn1  | mem | 1,3,6 | Plasma Membrane | - | other                   | Sertoli Cell-Sertoli Cell Junction Signaling                                                                                                                                                                                                                                         |
| Transcription initiation factor TFIID subunit 6                          | Taf6    | mem | 1,6   | Nucleus         | Y | transcription regulator | Assembly of RNA Polymerase II Complex; Estrogen Receptor Signaling; Glucocorticoid Receptor Signaling                                                                                                                                                                                |
| Thy-1 membrane glycoprotein                                              | Thy1    | mem | -     | Plasma Membrane | - | other                   | Granulocyte Adhesion and Diapedesis; Leukocyte Extravasation Signaling                                                                                                                                                                                                               |
| Ubiquitin-associated protein 2                                           | Ubap2   | mem | 5,6   | Cytoplasm       | Y | other                   | -                                                                                                                                                                                                                                                                                    |
| Ubiquilin-2                                                              | Ubqln2  | mem | 6     | Nucleus         | Y | other                   | -                                                                                                                                                                                                                                                                                    |
| L-lactate dehydrogenase A chain                                          | Ldha    | det | -     | Cytoplasm       | Y | enzyme                  | HIF1 $\alpha$ Signaling; Hypoxia Signaling in the Cardiovascular System; Pyruvate Fermentation to Lactate                                                                                                                                                                            |
| 60S ribosomal protein L7                                                 | Rpl7    | det | 6     | Nucleus         | Y | transcription regulator | EIF2 Signaling                                                                                                                                                                                                                                                                       |
| Succinate dehydrogenase [ubiquinone] flavoprotein subunit, mitochondrial | Sdha    | det | 6     | Cytoplasm       | - | enzyme                  | Huntington's Disease Signaling; Mitochondrial Dysfunction; Oxidative Phosphorylation; TCA Cycle II (Eukaryotic)                                                                                                                                                                      |
| ATP-citrate synthase                                                     | Acly    | det | 6     | Cytoplasm       | Y | enzyme                  | Acetyl-CoA Biosynthesis III (from Citrate); Insulin Receptor Signaling                                                                                                                                                                                                               |
| Fructose-bisphosphate aldolase A                                         | Aldoa   | det | 5,6   | Cytoplasm       | Y | enzyme                  | Gluconeogenesis I; Glycolysis I; Sucrose Degradation V (Mammalian)                                                                                                                                                                                                                   |
| ATP synthase subunit beta, mitochondrial                                 | Atp5b   | det | 5,6   | Cytoplasm       | Y | transporter             | Huntington's Disease Signaling; Mitochondrial Dysfunction; Oxidative Phosphorylation                                                                                                                                                                                                 |
| ATP synthase F(0) complex subunit B1, mitochondrial                      | Atp5f1  | det | -     | Cytoplasm       | Y | transporter             | Mitochondrial Dysfunction; Oxidative Phosphorylation                                                                                                                                                                                                                                 |
| CAD protein                                                              | Cad     | det | 5,6   | Cytoplasm       | Y | enzyme                  | Pyrimidine Ribonucleotides De Novo Biosynthesis; Uridine-5'-phosphate Biosynthesis                                                                                                                                                                                                   |
| T-complex protein 1 subunit gamma                                        | Cct3    | det | 1,6   | Cytoplasm       | Y | other                   | -                                                                                                                                                                                                                                                                                    |
| Coatomer subunit beta'                                                   | Copb2   | det | -     | Cytoplasm       | Y | transporter             | Caveolar-mediated Endocytosis Signaling                                                                                                                                                                                                                                              |

|                                                           |         |     |     |                 |   |                         |                                                                                                                                                                                                                                                                                                                                                                                                                                                                                                                                                                                                                                                                                                                                                                                                                                                                                                                                                                                                                                                                                                                              |
|-----------------------------------------------------------|---------|-----|-----|-----------------|---|-------------------------|------------------------------------------------------------------------------------------------------------------------------------------------------------------------------------------------------------------------------------------------------------------------------------------------------------------------------------------------------------------------------------------------------------------------------------------------------------------------------------------------------------------------------------------------------------------------------------------------------------------------------------------------------------------------------------------------------------------------------------------------------------------------------------------------------------------------------------------------------------------------------------------------------------------------------------------------------------------------------------------------------------------------------------------------------------------------------------------------------------------------------|
| Coactosin-like protein                                    | Cotl1   | det | 1   | Cytoplasm       | Y | other                   | -                                                                                                                                                                                                                                                                                                                                                                                                                                                                                                                                                                                                                                                                                                                                                                                                                                                                                                                                                                                                                                                                                                                            |
| Cleavage and polyadenylation specificity factor subunit 6 | Cpsf6   | det | -   | Nucleus         | Y | other                   | Cleavage and Polyadenylation of Pre-mRNA; Tight Junction Signaling                                                                                                                                                                                                                                                                                                                                                                                                                                                                                                                                                                                                                                                                                                                                                                                                                                                                                                                                                                                                                                                           |
| ATP-dependent RNA helicase DDX3X                          | Ddx3x   | det | 6   | Cytoplasm       | Y | enzyme                  | Pyrimidine Ribonucleotides De Novo Biosynthesis; Pyrimidine Ribonucleotides Interconversion                                                                                                                                                                                                                                                                                                                                                                                                                                                                                                                                                                                                                                                                                                                                                                                                                                                                                                                                                                                                                                  |
| DnaJ homolog subfamily B member 1                         | Dnajb1  | det | 5   | Nucleus         | Y | transcription regulator | Aldosterone Signaling in Epithelial Cells; Androgen Signaling; Huntington's Disease Signaling; NRF2-mediated Oxidative Stress Response; Protein Ubiquitination Pathway                                                                                                                                                                                                                                                                                                                                                                                                                                                                                                                                                                                                                                                                                                                                                                                                                                                                                                                                                       |
| Dedicator of cytokinesis protein 2                        | Dock2   | det | -   | Cytoplasm       | Y | other                   | -                                                                                                                                                                                                                                                                                                                                                                                                                                                                                                                                                                                                                                                                                                                                                                                                                                                                                                                                                                                                                                                                                                                            |
| Dihydropyrimidinase-related protein 2                     | Dpysl2  | det | 5   | Cytoplasm       | Y | enzyme                  | Axonal Guidance Signaling; Semaphorin Signaling in Neurons; Thymine Degradation; Uracil Degradation II (Reductive)                                                                                                                                                                                                                                                                                                                                                                                                                                                                                                                                                                                                                                                                                                                                                                                                                                                                                                                                                                                                           |
| Elongation factor 1-alpha 1                               | Eef1a1  | det | 2,5 | Cytoplasm       | Y | translation regulator   | -                                                                                                                                                                                                                                                                                                                                                                                                                                                                                                                                                                                                                                                                                                                                                                                                                                                                                                                                                                                                                                                                                                                            |
| Eukaryotic translation initiation factor 3 subunit F      | Eif3f   | det | -   | Cytoplasm       | Y | translation regulator   | EIF2 Signaling; mTOR Signaling; Regulation of eIF4 and p70S6K Signaling                                                                                                                                                                                                                                                                                                                                                                                                                                                                                                                                                                                                                                                                                                                                                                                                                                                                                                                                                                                                                                                      |
| Bifunctional glutamate/proline--tRNA ligase               | Eprs    | det | 1,6 | Cytoplasm       | Y | enzyme                  | tRNA Charging                                                                                                                                                                                                                                                                                                                                                                                                                                                                                                                                                                                                                                                                                                                                                                                                                                                                                                                                                                                                                                                                                                                |
| Extended synaptotagmin-1                                  | Esyt1   | det | 1,6 | Cytoplasm       | Y | other                   | -                                                                                                                                                                                                                                                                                                                                                                                                                                                                                                                                                                                                                                                                                                                                                                                                                                                                                                                                                                                                                                                                                                                            |
| Fatty acid-binding protein, epidermal                     | Fabp5   | det | 6   | Cytoplasm       | Y | transporter             | LPS/IL-1 Mediated Inhibition of RXR Function                                                                                                                                                                                                                                                                                                                                                                                                                                                                                                                                                                                                                                                                                                                                                                                                                                                                                                                                                                                                                                                                                 |
| Fatty acid synthase                                       | Fasn    | det | 6   | Cytoplasm       | Y | enzyme                  | AMPK Signaling; Fatty Acid Biosynthesis Initiation II; FXR/RXR Activation; LXR/RXR Activation; Palmitate Biosynthesis I (Animals); PPAR $\alpha$ /RXR $\alpha$ Activation; Stearate Biosynthesis I (Animals); TR/RXR Activation                                                                                                                                                                                                                                                                                                                                                                                                                                                                                                                                                                                                                                                                                                                                                                                                                                                                                              |
| Fermitin family homolog 3                                 | Fermt3  | det | -   | Cytoplasm       | Y | enzyme                  | -                                                                                                                                                                                                                                                                                                                                                                                                                                                                                                                                                                                                                                                                                                                                                                                                                                                                                                                                                                                                                                                                                                                            |
| Ribosomal protein L15                                     | Gm10020 | det | -   | Other           | - | other                   | -                                                                                                                                                                                                                                                                                                                                                                                                                                                                                                                                                                                                                                                                                                                                                                                                                                                                                                                                                                                                                                                                                                                            |
| Guanine nucleotide-binding protein G(i) subunit alpha-2   | Gnai2   | det | 5   | Plasma Membrane | - | enzyme                  | Agranulocyte Adhesion and Diapedesis; Androgen Signaling; Axonal Guidance Signaling; Breast Cancer Regulation by Stathmin1; cAMP-mediated signaling; Cardiac Hypertrophy Signaling; CCR3 Signaling in Eosinophils; CCR5 Signaling in Macrophages; Chemokine Signaling; Corticotropin Releasing Hormone Signaling; CREB Signaling in Neurons; CXCR4 Signaling; Dopamine-DARPP32 Feedback in cAMP Signaling; Endothelin-1 Signaling; Ephrin B Signaling; Ephrin Receptor Signaling; fMLP Signaling in Neutrophils; Gap Junction Signaling; G Beta Gamma Signaling; GNRH Signaling; GPCR-Mediated Integration of Enteroendocrine Signaling Exemplified by an L Cell; GPCR-Mediated Nutrient Sensing in Enteroendocrine Cells; G-Protein Coupled Receptor Signaling; Granulocyte Adhesion and Diapedesis; G $\alpha$ i Signaling; IL-1 Signaling; IL-8 Signaling; Leukocyte Extravasation Signaling; Melatonin Signaling; Molecular Mechanisms of Cancer; P2Y Purigenic Receptor Signaling Pathway; p70S6K Signaling; Protein Kinase A Signaling; Relaxin Signaling; RhoGDI Signaling; Role of NFAT in Cardiac Hypertrophy; Role |

|                                     |            |     |             |           |   |                         |                                                                                                                                                                                                                                                                                        |
|-------------------------------------|------------|-----|-------------|-----------|---|-------------------------|----------------------------------------------------------------------------------------------------------------------------------------------------------------------------------------------------------------------------------------------------------------------------------------|
|                                     |            |     |             |           |   |                         | of NFAT in Regulation of the Immune Response; Role of PI3K/AKT Signaling in the Pathogenesis of Influenza; Signaling by Rho Family GTPases; Sphingosine-1-phosphate Signaling; Synaptic Long Term Depression; Tec Kinase Signaling; Thrombin Signaling; $\alpha$ -Adrenergic Signaling |
| Golgi reassembly-stacking protein 2 | Gorasp2    | det | 6           | Cytoplasm | Y | other                   | -                                                                                                                                                                                                                                                                                      |
| Histone H3.3                        | H3f3b      | det | 6           | Nucleus   | Y | other                   | ERK/MAPK Signaling; Estrogen Receptor Signaling; p38 MAPK Signaling; Protein Kinase A Signaling; UVB-Induced MAPK Signaling                                                                                                                                                            |
| Histone H3.3C                       | H3f3c      | det | -           | Nucleus   | Y | other                   | -                                                                                                                                                                                                                                                                                      |
| Host cell factor 1                  | Hcfc1      | det | 1,2,3,4,5,6 | Nucleus   | Y | transcription regulator | -                                                                                                                                                                                                                                                                                      |
| Histone H1.2                        | Hist1h1c   | det | -           | Nucleus   | Y | other                   | Granzyme A Signaling; Protein Kinase A Signaling                                                                                                                                                                                                                                       |
| Histone H1.3                        | Hist1h1d   | det | 6           | Nucleus   | Y | other                   | Granzyme A Signaling; Protein Kinase A Signaling                                                                                                                                                                                                                                       |
| Histone H2A                         | Hist1h2al  | det | -           | Other     | Y | other                   | -                                                                                                                                                                                                                                                                                      |
| Histone H2B type 1-B                | Hist1h2bb  | det | -           | Nucleus   | Y | other                   | -                                                                                                                                                                                                                                                                                      |
| Histone H2B type 1-C/E/G            | Hist1h2bg  | det | 6           | Nucleus   | Y | other                   | -                                                                                                                                                                                                                                                                                      |
| Histone H2B type 1-H                | Hist1h2bh  | det | 6           | Other     | Y | other                   | -                                                                                                                                                                                                                                                                                      |
| Histone H2B type 1-K                | Hist1h2bk  | det | -           | Nucleus   | Y | other                   | -                                                                                                                                                                                                                                                                                      |
| Histone H2B type 1-M                | Hist1h2bm  | det | -           | Nucleus   | Y | other                   | -                                                                                                                                                                                                                                                                                      |
| Histone H2B type 1-F/J/L            | Hist1h2bn  | det | -           | Nucleus   | Y | other                   | -                                                                                                                                                                                                                                                                                      |
| Histone H2B type 1-P                | Hist1h2bp  | det | -           | Nucleus   | Y | other                   | -                                                                                                                                                                                                                                                                                      |
| Histone H2B                         | Hist1h2br  | det | -           | Nucleus   | - | other                   | -                                                                                                                                                                                                                                                                                      |
| Histone H2A type 2-A                | Hist2h2aa1 | det | -           | Nucleus   | Y | other                   | -                                                                                                                                                                                                                                                                                      |
| Histone H2A type 2-A                | Hist2h2aa2 | det | -           | Nucleus   | Y | other                   | -                                                                                                                                                                                                                                                                                      |
| Histone H2A type 2-C                | Hist2h2ac  | det | -           | Nucleus   | Y | other                   | -                                                                                                                                                                                                                                                                                      |
| Histone H2B type 2-B                | Hist2h2bb  | det | -           | Nucleus   | Y | other                   | -                                                                                                                                                                                                                                                                                      |
| Histone H3.2                        | Hist2h3b   | det | -           | Nucleus   | Y | other                   | -                                                                                                                                                                                                                                                                                      |
| Histone H3.2                        | Hist2h3c2  | det | -           | Nucleus   | Y | other                   | -                                                                                                                                                                                                                                                                                      |

|                                                              |          |     |     |           |   |                         |                                                                                                                                                                                                                                                                                                                                                                                                                                                                                                                                            |
|--------------------------------------------------------------|----------|-----|-----|-----------|---|-------------------------|--------------------------------------------------------------------------------------------------------------------------------------------------------------------------------------------------------------------------------------------------------------------------------------------------------------------------------------------------------------------------------------------------------------------------------------------------------------------------------------------------------------------------------------------|
| High mobility group protein B1                               | Hmgb1    | det | 6   | Nucleus   | Y | transcription regulator | -                                                                                                                                                                                                                                                                                                                                                                                                                                                                                                                                          |
| Heterogeneous nuclear ribonucleoprotein A1                   | Hnrnpa1  | det | 6   | Nucleus   | Y | other                   | -                                                                                                                                                                                                                                                                                                                                                                                                                                                                                                                                          |
| Heat shock protein HSP 90-alpha                              | Hsp90aa1 | det | 2,6 | Cytoplasm | Y | enzyme                  | Aldosterone Signaling in Epithelial Cells; Androgen Signaling; Aryl Hydrocarbon Receptor Signaling; eNOS Signaling; Glucocorticoid Receptor Signaling; HIF1 $\alpha$ Signaling; Hypoxia Signaling in the Cardiovascular System; Mitotic Roles of Polo-Like Kinase; Neuregulin Signaling; Nitric Oxide Signaling in the Cardiovascular System; PI3K/AKT Signaling; PPAR Signaling; PPAR $\alpha$ /RXR $\alpha$ Activation; Prostate Cancer Signaling; Protein Ubiquitination Pathway; Telomerase Signaling; Xenobiotic Metabolism Signaling |
| Heat shock protein HSP 90-beta                               | Hsp90ab1 | det | 2,6 | Cytoplasm | Y | enzyme                  | Aldosterone Signaling in Epithelial Cells; Aryl Hydrocarbon Receptor Signaling; eNOS Signaling; Glucocorticoid Receptor Signaling; Hypoxia Signaling in the Cardiovascular System; Mitotic Roles of Polo-Like Kinase; Neuregulin Signaling; Nitric Oxide Signaling in the Cardiovascular System; PI3K/AKT Signaling; PPAR Signaling; PPAR $\alpha$ /RXR $\alpha$ Activation; Prostate Cancer Signaling; Protein Ubiquitination Pathway; Telomerase Signaling; Xenobiotic Metabolism Signaling                                              |
| Ras GTPase-activating-like protein IQGAP1                    | Iqgap1   | det | 1,6 | Cytoplasm | Y | other                   | Actin Cytoskeleton Signaling; Cdc42 Signaling; Epithelial Adherens Junction Signaling; Germ Cell-Sertoli Cell Junction Signaling; IL-8 Signaling; Rac Signaling; Remodeling of Epithelial Adherens Junctions; Signaling by Rho Family GTPases                                                                                                                                                                                                                                                                                              |
| Methylcrotonoyl-CoA carboxylase subunit alpha, mitochondrial | Mccc1    | det | 6   | Cytoplasm | - | enzyme                  | Leucine Degradation I                                                                                                                                                                                                                                                                                                                                                                                                                                                                                                                      |
| DNA replication licensing factor MCM3                        | Mcm3     | det | -   | Nucleus   | Y | enzyme                  | Cell Cycle Control of Chromosomal Replication                                                                                                                                                                                                                                                                                                                                                                                                                                                                                              |
| DNA replication licensing factor MCM5                        | Mcm5     | det | 6   | Nucleus   | Y | enzyme                  | Cell Cycle Control of Chromosomal Replication                                                                                                                                                                                                                                                                                                                                                                                                                                                                                              |
| DNA replication licensing factor MCM6                        | Mcm6     | det | -   | Nucleus   | Y | enzyme                  | Cell Cycle Control of Chromosomal Replication                                                                                                                                                                                                                                                                                                                                                                                                                                                                                              |
| DNA replication licensing factor MCM7                        | Mcm7     | det | 6   | Nucleus   | Y | enzyme                  | Aryl Hydrocarbon Receptor Signaling; Cell Cycle Control of Chromosomal Replication                                                                                                                                                                                                                                                                                                                                                                                                                                                         |
| Myb-binding protein 1A                                       | Mybbp1a  | det | 6   | Nucleus   | Y | transcription regulator |                                                                                                                                                                                                                                                                                                                                                                                                                                                                                                                                            |
| Nucleolin                                                    | Ncl      | det | 6   | Nucleus   | Y | other                   | -                                                                                                                                                                                                                                                                                                                                                                                                                                                                                                                                          |
| Non-POU domain-containing octamer-binding protein            | Nono     | det | 6   | Nucleus   | Y | other                   | -                                                                                                                                                                                                                                                                                                                                                                                                                                                                                                                                          |
| Osteoclast-stimulating factor 1                              | Ostf1    | det | -   | Nucleus   | Y | transcription regulator | -                                                                                                                                                                                                                                                                                                                                                                                                                                                                                                                                          |
| Protein disulfide-isomerase                                  | P4hb     | det | -   | Cytoplasm | - | enzyme                  | Hypoxia Signaling in the Cardiovascular System; Role of Tissue Factor in Cancer; Unfolded                                                                                                                                                                                                                                                                                                                                                                                                                                                  |

|                                                                  |         |     |       |           |   |                         |                                                                                                                                                                                                                                                                                                                                                             |
|------------------------------------------------------------------|---------|-----|-------|-----------|---|-------------------------|-------------------------------------------------------------------------------------------------------------------------------------------------------------------------------------------------------------------------------------------------------------------------------------------------------------------------------------------------------------|
|                                                                  |         |     |       |           |   |                         | protein response                                                                                                                                                                                                                                                                                                                                            |
| Proliferation-associated protein 2G4                             | Pa2g4   | det | 6     | Nucleus   | Y | transcription regulator | Bladder Cancer Signaling; Cell Cycle: G1/S Checkpoint Regulation; Chronic Myeloid Leukemia Signaling; Cyclins and Cell Cycle Regulation; Glioma Signaling; Molecular Mechanisms of Cancer; Non-Small Cell Lung Cancer Signaling; Ovarian Cancer Signaling; Pancreatic Adenocarcinoma Signaling; Prostate Cancer Signaling; Small Cell Lung Cancer Signaling |
| Polyadenylate-binding protein 1                                  | Pabpc1  | det | 5,6   | Cytoplasm | Y | translation regulator   | Antiproliferative Role of TOB in T Cell Signaling; EIF2 Signaling; Regulation of eIF4 and p70S6K Signaling                                                                                                                                                                                                                                                  |
| Ectonucleotide pyrophosphatase/phosphodiesterase family member 1 | Pc      | det | -     |           | Y |                         | -                                                                                                                                                                                                                                                                                                                                                           |
| Programmed cell death 6-interacting protein                      | Pdcd6ip | det | 1,6   | Cytoplasm | Y | other                   | 14-3-3-mediated Signaling; Mechanisms of Viral Exit from Host Cells                                                                                                                                                                                                                                                                                         |
| 6-phosphogluconate dehydrogenase, decarboxylating                | Pgd     | det | -     | Cytoplasm | Y | enzyme                  | Pentose Phosphate Pathway; Pentose Phosphate Pathway (Oxidative Branch)                                                                                                                                                                                                                                                                                     |
| Proteasome subunit alpha type-7                                  | Psm7    | det | -     | Cytoplasm | Y | peptidase               | Protein Ubiquitination Pathway                                                                                                                                                                                                                                                                                                                              |
| Proteasome activator complex subunit 2                           | Psme2   | det | 1,6   | Cytoplasm | Y | peptidase               | Huntington's Disease Signaling; Polyamine Regulation in Colon Cancer; Protein Ubiquitination Pathway                                                                                                                                                                                                                                                        |
| MCG22048, isoform CRA_c                                          | PSME2b  | det | -     |           | - |                         | -                                                                                                                                                                                                                                                                                                                                                           |
| 60S ribosomal protein L15                                        | Rpl15   | det | 6     | Cytoplasm | Y | other                   | EIF2 Signaling                                                                                                                                                                                                                                                                                                                                              |
| 60S ribosomal protein L18a                                       | Rpl18a  | det | 6     | Cytoplasm | Y | other                   | EIF2 Signaling                                                                                                                                                                                                                                                                                                                                              |
| 60S ribosomal protein L5                                         | Rpl5    | det | 6     | Cytoplasm | Y | other                   | Cell Cycle: G1/S Checkpoint Regulation; EIF2 Signaling                                                                                                                                                                                                                                                                                                      |
| 60S ribosomal protein L6                                         | Rpl6    | det | 6     | Nucleus   | Y | other                   | EIF2 Signaling                                                                                                                                                                                                                                                                                                                                              |
| Regulation of nuclear pre-mRNA domain-containing protein 2       | Rprd2   | det | 4,5,6 | Nucleus   | Y | other                   | -                                                                                                                                                                                                                                                                                                                                                           |
| 40S ribosomal protein S10                                        | Rps10   | det | 6     | Cytoplasm | Y | other                   | EIF2 Signaling; mTOR Signaling; Regulation of eIF4 and p70S6K Signaling                                                                                                                                                                                                                                                                                     |
| 40S ribosomal protein S15a                                       | Rps15a  | det | -     | Cytoplasm | - | other                   | EIF2 Signaling; mTOR Signaling; Regulation of eIF4 and p70S6K Signaling                                                                                                                                                                                                                                                                                     |
| 40S ribosomal protein S2                                         | Rps2    | det | 6     | Cytoplasm | Y | other                   | EIF2 Signaling; mTOR Signaling; Regulation of eIF4 and p70S6K Signaling                                                                                                                                                                                                                                                                                     |
| 40S ribosomal protein S4, X isoform                              | Rps4x   | det | 6     | Cytoplasm | - | other                   | EIF2 Signaling; mTOR Signaling; Regulation of eIF4 and p70S6K Signaling                                                                                                                                                                                                                                                                                     |
| Serine--tRNA ligase, cytoplasmic                                 | Sars    | det | -     | Cytoplasm | Y | enzyme                  | Selenocysteine Biosynthesis II (Archaea and Eukaryotes); tRNA Charging                                                                                                                                                                                                                                                                                      |
| Histone-lysine N-methyltransferase SETD7                         | Set     | det | 6     | Nucleus   | - | phosphatase             | 3-phosphoinositide Biosynthesis; 3-phosphoinositide Degradation; D-myo-inositol (1,4,5,6)-Tetrakisphosphate Biosynthesis; D-myo-inositol (3,4,5,6)-tetrakisphosphate Biosynthesis; D-myo-inositol-5-phosphate Metabolism; Granzyme A Signaling; Superpathway of Inositol                                                                                    |

|                                                            |        |     |       |                     |   |                         |                                                                                                                                                                                                                                                                                                           |
|------------------------------------------------------------|--------|-----|-------|---------------------|---|-------------------------|-----------------------------------------------------------------------------------------------------------------------------------------------------------------------------------------------------------------------------------------------------------------------------------------------------------|
|                                                            |        |     |       |                     |   |                         | Phosphate Compounds; Transcriptional Regulatory Network in Embryonic Stem Cells                                                                                                                                                                                                                           |
| Splicing factor 3A subunit 1                               | Sf3a1  | det | 1,6   | Nucleus             | Y | other                   | Assembly of RNA Polymerase III Complex; Role of p14/p19ARF in Tumor Suppression                                                                                                                                                                                                                           |
| Splicing factor, proline- and glutamine-rich               | Sfpq   | det | 1,5,6 | Nucleus             | Y | other                   | -                                                                                                                                                                                                                                                                                                         |
| Small nuclear ribonucleoprotein Sm D1                      | Snrpd1 | det | -     | Nucleus             | - | other                   | Systemic Lupus Erythematosus Signaling                                                                                                                                                                                                                                                                    |
| TAR DNA-binding protein 43                                 | Tardbp | det | 6     | Nucleus             | Y | transcription regulator | -                                                                                                                                                                                                                                                                                                         |
| Valine--tRNA ligase                                        | Vars   | det | 6     | Cytoplasm           | Y | enzyme                  | tRNA Charging                                                                                                                                                                                                                                                                                             |
| Voltage-dependent anion-selective channel protein 1        | Vdac1  | det | 1,5   | Cytoplasm           | - | ion channel             | Mitochondrial Dysfunction                                                                                                                                                                                                                                                                                 |
| Voltage-dependent anion-selective channel protein 2        | Vdac2  | det | 1,6   | Cytoplasm           | Y | ion channel             | Mitochondrial Dysfunction                                                                                                                                                                                                                                                                                 |
| 14-3-3 protein beta/alpha                                  | Ywhab  | det | 6     | Cytoplasm           | Y | transcription regulator | 14-3-3-mediated Signaling; Cell Cycle: G2/M DNA Damage Checkpoint Regulation; ERK/MAPK Signaling; ERK5 Signaling; HIPPO signaling; IGF-1 Signaling; Myc Mediated Apoptosis Signaling; p70S6K Signaling; PI3K/AKT Signaling; Protein Kinase A Signaling                                                    |
| 14-3-3 protein epsilon                                     | Ywhae  | det | 6     | Cytoplasm           | Y | other                   | 14-3-3-mediated Signaling; Cell Cycle: G2/M DNA Damage Checkpoint Regulation; ERK5 Signaling; HIPPO signaling; IGF-1 Signaling; Myc Mediated Apoptosis Signaling; Neuroprotective Role of THOP1 in Alzheimer's Disease; p70S6K Signaling; PI3K/AKT Signaling; Protein Kinase A Signaling; VEGF Signaling  |
| 14-3-3 protein gamma                                       | Ywhag  | det | -     | Cytoplasm           | Y | other                   | 14-3-3-mediated Signaling; Cell Cycle: G2/M DNA Damage Checkpoint Regulation; ERK/MAPK Signaling; ERK5 Signaling; HIPPO signaling; IGF-1 Signaling; Myc Mediated Apoptosis Signaling; p70S6K Signaling; PI3K/AKT Signaling; Protein Kinase A Signaling                                                    |
| 14-3-3 protein eta                                         | Ywhah  | det | -     | Cytoplasm           | Y | transcription regulator | 14-3-3-mediated Signaling; Cell Cycle: G2/M DNA Damage Checkpoint Regulation; ERK/MAPK Signaling; ERK5 Signaling; Glucocorticoid Receptor Signaling; HIPPO signaling; IGF-1 Signaling; Myc Mediated Apoptosis Signaling; p70S6K Signaling; PI3K/AKT Signaling; Protein Kinase A Signaling; PTEN Signaling |
| 14-3-3 protein theta                                       | Ywhaq  | det | 1,6   | Cytoplasm           | Y | other                   | 14-3-3-mediated Signaling; Cell Cycle: G2/M DNA Damage Checkpoint Regulation; ERK/MAPK Signaling; ERK5 Signaling; HIPPO signaling; IGF-1 Signaling; Myc Mediated Apoptosis Signaling; p70S6K Signaling; PI3K/AKT Signaling; Protein Kinase A Signaling                                                    |
| Zinc finger CCCH domain-containing protein 13              | Zc3h13 | det | 6     | Extracellular Space | Y | other                   | -                                                                                                                                                                                                                                                                                                         |
| BUB3-interacting and GLEBS motif-containing protein ZNF207 | Znf207 | det | 1,6   |                     | - |                         | -                                                                                                                                                                                                                                                                                                         |





## S2. Complete list and analysis of singly identified O-GlcNAcylated proteins

Ref = Identification Reference, Phos = Known phosphorylation

| Protein                                     | Gene   | Ref | Location  | Phos | Family                  | Pathways                                                                                                                                                                                                                                                                                                                                                                                                                                                                                                                                                                                                                                                                                                                                                                                                                                                                                                                                                                                                                                                                                                                                                                                                               |
|---------------------------------------------|--------|-----|-----------|------|-------------------------|------------------------------------------------------------------------------------------------------------------------------------------------------------------------------------------------------------------------------------------------------------------------------------------------------------------------------------------------------------------------------------------------------------------------------------------------------------------------------------------------------------------------------------------------------------------------------------------------------------------------------------------------------------------------------------------------------------------------------------------------------------------------------------------------------------------------------------------------------------------------------------------------------------------------------------------------------------------------------------------------------------------------------------------------------------------------------------------------------------------------------------------------------------------------------------------------------------------------|
| Actin-binding LIM protein 3                 | Ablim3 | 5   | Cytoplasm | Y    | other                   | Axonal Guidance Signaling; Netrin Signaling                                                                                                                                                                                                                                                                                                                                                                                                                                                                                                                                                                                                                                                                                                                                                                                                                                                                                                                                                                                                                                                                                                                                                                            |
| 3-ketoacyl-CoA thiolase A, peroxisomal      | Acaa1a |     | Cytoplasm |      | enzyme                  | Fatty Acid $\beta$ -oxidation I; PPAR $\alpha$ /RXR $\alpha$ Activation                                                                                                                                                                                                                                                                                                                                                                                                                                                                                                                                                                                                                                                                                                                                                                                                                                                                                                                                                                                                                                                                                                                                                |
| Acetyl-CoA carboxylase 1                    | Acaca  | 5,6 | Cytoplasm | Y    | enzyme                  | AMPK Signaling; Biotin-carboxyl Carrier Protein Assembly; LXR/RXR Activation; TR/RXR Activation                                                                                                                                                                                                                                                                                                                                                                                                                                                                                                                                                                                                                                                                                                                                                                                                                                                                                                                                                                                                                                                                                                                        |
| Acetyl-CoA acetyltransferase, mitochondrial | Acat1  | 6   | Cytoplasm | Y    | enzyme                  | Glutaryl-CoA Degradation; Isoleucine Degradation I; Ketogenesis; Ketolysis; Mevalonate Pathway I; Superpathway of Cholesterol Biosynthesis; Superpathway of Geranylgeranyldiphosphate Biosynthesis I (via Mevalonate); Tryptophan Degradation III (Eukaryotic)                                                                                                                                                                                                                                                                                                                                                                                                                                                                                                                                                                                                                                                                                                                                                                                                                                                                                                                                                         |
| Actin, cytoplasmic 1                        | Actb   | 5,6 | Cytoplasm |      | other                   | Actin Cytoskeleton Signaling; Agranulocyte Adhesion and Diapedesis; Agrin Interactions at Neuromuscular Junction; AMPK Signaling; Caveolar-mediated Endocytosis Signaling; Cellular Effects of Sildenafil (Viagra); Clathrin-mediated Endocytosis Signaling; Crosstalk between Dendritic Cells and Natural Killer Cells; Death Receptor Signaling; EIF2 Signaling; Epithelial Adherens Junction Signaling; FAK Signaling; Fc $\gamma$ Receptor-mediated Phagocytosis in Macrophages and Monocytes; Gap Junction Signaling; Germ Cell-Sertoli Cell Junction Signaling; Glucocorticoid Receptor Signaling; Hereditary Breast Cancer Signaling; ILK Signaling; Integrin Signaling; Leukocyte Extravasation Signaling; Mechanisms of Viral Exit from Host Cells; MSP-RON Signaling Pathway; NRF2-mediated Oxidative Stress Response; Paxillin Signaling; RAR Activation; Regulation of Actin-based Motility by Rho; Remodeling of Epithelial Adherens Junctions; RhoA Signaling; RhoGDI Signaling; Role of BRCA1 in DNA Damage Response; Sertoli Cell-Sertoli Cell Junction Signaling; Signaling by Rho Family GTPases; Tec Kinase Signaling; Tight Junction Signaling; VEGF Signaling; Virus Entry via Endocytic Pathways |
| Actin, cytoplasmic 2                        | Actg1  |     | Cytoplasm |      | other                   | Actin Cytoskeleton Signaling; Agranulocyte Adhesion and Diapedesis; Agrin Interactions at Neuromuscular Junction; Caveolar-mediated Endocytosis Signaling; Cellular Effects of Sildenafil (Viagra); Clathrin-mediated Endocytosis Signaling; Crosstalk between Dendritic Cells and Natural Killer Cells; Death Receptor Signaling; Epithelial Adherens Junction Signaling; FAK Signaling; Fc $\gamma$ Receptor-mediated Phagocytosis in Macrophages and Monocytes; Gap Junction Signaling; Germ Cell-Sertoli Cell Junction Signaling; ILK Signaling; Integrin Signaling; Leukocyte Extravasation Signaling; Mechanisms of Viral Exit from Host Cells; MSP-RON Signaling Pathway; NRF2-mediated Oxidative Stress Response; Paxillin Signaling; Remodeling of Epithelial Adherens Junctions; RhoA Signaling; RhoGDI Signaling; Sertoli Cell-Sertoli Cell Junction Signaling; Signaling by Rho Family GTPases; Tec Kinase Signaling; Tight Junction Signaling; VEGF Signaling; Virus Entry via Endocytic Pathways                                                                                                                                                                                                         |
| Alpha-actinin-1                             | Actn1  | 6   | Cytoplasm | Y    | transcription regulator |                                                                                                                                                                                                                                                                                                                                                                                                                                                                                                                                                                                                                                                                                                                                                                                                                                                                                                                                                                                                                                                                                                                                                                                                                        |
| Alpha-actinin-4                             | Actn4  | 6   | Cytoplasm | Y    | transcription regulator |                                                                                                                                                                                                                                                                                                                                                                                                                                                                                                                                                                                                                                                                                                                                                                                                                                                                                                                                                                                                                                                                                                                                                                                                                        |

|                                                   |         |       |                 |   |             |                                                                                                                                                                                                                                                                                                                                                                                                                                                                                                                                                            |
|---------------------------------------------------|---------|-------|-----------------|---|-------------|------------------------------------------------------------------------------------------------------------------------------------------------------------------------------------------------------------------------------------------------------------------------------------------------------------------------------------------------------------------------------------------------------------------------------------------------------------------------------------------------------------------------------------------------------------|
| Actin-related protein 2                           | Actr2   |       | Plasma Membrane |   | other       | Actin Cytoskeleton Signaling; Actin Nucleation by ARP-WASP Complex; Axonal Guidance Signaling; CD28 Signaling in T Helper Cells; Cdc42 Signaling; Clathrin-mediated Endocytosis Signaling; Ephrin Receptor Signaling; Epithelial Adherens Junction Signaling; Fcγ Receptor-mediated Phagocytosis in Macrophages and Monocytes; fMLP Signaling in Neutrophils; Integrin Signaling; Rac Signaling; Regulation of Actin-based Motility by Rho; Remodeling of Epithelial Adherens Junctions; RhoA Signaling; RhoGDI Signaling; Signaling by Rho Family GTPases |
| Actin-related protein 3                           | Actr3   |       | Plasma Membrane |   | other       | Actin Cytoskeleton Signaling; Actin Nucleation by ARP-WASP Complex; Axonal Guidance Signaling; CD28 Signaling in T Helper Cells; Cdc42 Signaling; Clathrin-mediated Endocytosis Signaling; Ephrin Receptor Signaling; Epithelial Adherens Junction Signaling; Fcγ Receptor-mediated Phagocytosis in Macrophages and Monocytes; fMLP Signaling in Neutrophils; Integrin Signaling; Rac Signaling; Regulation of Actin-based Motility by Rho; Remodeling of Epithelial Adherens Junctions; RhoA Signaling; RhoGDI Signaling; Signaling by Rho Family GTPases |
| Alcohol dehydrogenase class-3                     | Adh5    |       | Cytoplasm       | Y | enzyme      | Ethanol Degradation II; Formaldehyde Oxidation II (Glutathione-dependent); Noradrenaline and Adrenaline Degradation; Serotonin Degradation                                                                                                                                                                                                                                                                                                                                                                                                                 |
| Arf-GAP domain and FG repeat-containing protein 1 | Agfg1   | 1,5,6 | Nucleus         | Y | other       |                                                                                                                                                                                                                                                                                                                                                                                                                                                                                                                                                            |
| AHNAK nucleoprotein (desmoyokin)                  | Ahnak   | 1,6   | Nucleus         |   | other       | Phospholipase C Signaling                                                                                                                                                                                                                                                                                                                                                                                                                                                                                                                                  |
| A-kinase anchor protein 8-like                    | Akap8l  | 6     | Nucleus         | Y | other       |                                                                                                                                                                                                                                                                                                                                                                                                                                                                                                                                                            |
| Ankyrin repeat and KH domain-containing 1         | Ankhd1  | 1,5,6 | Other           |   | other       |                                                                                                                                                                                                                                                                                                                                                                                                                                                                                                                                                            |
| Annexin A2                                        | Anxa2   | 6     | Plasma Membrane | Y | other       |                                                                                                                                                                                                                                                                                                                                                                                                                                                                                                                                                            |
| Annexin A5                                        | Anxa5   |       | Plasma Membrane | Y | transporter |                                                                                                                                                                                                                                                                                                                                                                                                                                                                                                                                                            |
| Annexin A6                                        | Anxa6   |       | Plasma Membrane | Y | ion channel |                                                                                                                                                                                                                                                                                                                                                                                                                                                                                                                                                            |
| AP-2 complex subunit beta                         | Ap2b1   | 6     | Plasma Membrane | Y | other       | Clathrin-mediated Endocytosis Signaling; CTLA4 Signaling in Cytotoxic T Lymphocytes; GABA Receptor Signaling; Lipid Antigen Presentation by CD1; Virus Entry via Endocytic Pathways                                                                                                                                                                                                                                                                                                                                                                        |
| Adenine phosphoribosyltransferase                 | Aprt    |       | Cytoplasm       | Y | enzyme      | Adenine and Adenosine Salvage I                                                                                                                                                                                                                                                                                                                                                                                                                                                                                                                            |
| ADP-ribosylation factor 1                         | Arf1    |       | Cytoplasm       |   | enzyme      | Integrin Signaling; Paxillin Signaling                                                                                                                                                                                                                                                                                                                                                                                                                                                                                                                     |
| ADP-ribosylation factor 3                         | Arf3    | 6     | Cytoplasm       |   | enzyme      | Integrin Signaling                                                                                                                                                                                                                                                                                                                                                                                                                                                                                                                                         |
| ADP-ribosylation factor 5                         | Arf5    |       | Cytoplasm       |   | enzyme      | Integrin Signaling                                                                                                                                                                                                                                                                                                                                                                                                                                                                                                                                         |
| Rho GDP-dissociation inhibitor 1                  | Arhgdia | 2,6   | Cytoplasm       | Y | other       | Regulation of Actin-based Motility by Rho; RhoGDI Signaling; Sumoylation Pathway                                                                                                                                                                                                                                                                                                                                                                                                                                                                           |
| Rho GDP-dissociation inhibitor 2                  | Arhgdib |       | Cytoplasm       | Y | enzyme      | Death Receptor Signaling; RhoGDI Signaling; Sumoylation Pathway                                                                                                                                                                                                                                                                                                                                                                                                                                                                                            |

|                                                         |           |       |                 |   |                       |                                                                                                                                                                                                                                                                                                                                                                                                                                                                                                                                                                                                       |
|---------------------------------------------------------|-----------|-------|-----------------|---|-----------------------|-------------------------------------------------------------------------------------------------------------------------------------------------------------------------------------------------------------------------------------------------------------------------------------------------------------------------------------------------------------------------------------------------------------------------------------------------------------------------------------------------------------------------------------------------------------------------------------------------------|
| Rho guanine nucleotide exchange factor 10-like protein  | Arhgef10l |       | Cytoplasm       |   | enzyme                |                                                                                                                                                                                                                                                                                                                                                                                                                                                                                                                                                                                                       |
| Actin-related protein 2/3 complex subunit 2             | Arpc2     |       | Cytoplasm       |   | other                 | Actin Cytoskeleton Signaling; Actin Nucleation by ARP-WASP Complex; Axonal Guidance Signaling; CD28 Signaling in T Helper Cells; Cdc42 Signaling; Clathrin-mediated Endocytosis Signaling; Ephrin Receptor Signaling; Epithelial Adherens Junction Signaling; Fcγ Receptor-mediated Phagocytosis in Macrophages and Monocytes; fMLP Signaling in Neutrophils; Integrin Signaling; Rac Signaling; Regulation of Actin-based Motility by Rho; Remodeling of Epithelial Adherens Junctions; RhoA Signaling; RhoGDI Signaling; Signaling by Rho Family GTPases                                            |
| Actin-related protein 2/3 complex subunit 3             | Arpc3     |       | Cytoplasm       | Y | other                 | Actin Cytoskeleton Signaling; Actin Nucleation by ARP-WASP Complex; Axonal Guidance Signaling; CD28 Signaling in T Helper Cells; Cdc42 Signaling; Clathrin-mediated Endocytosis Signaling; Ephrin Receptor Signaling; Epithelial Adherens Junction Signaling; Fcγ Receptor-mediated Phagocytosis in Macrophages and Monocytes; fMLP Signaling in Neutrophils; Integrin Signaling; Rac Signaling; Regulation of Actin-based Motility by Rho; Remodeling of Epithelial Adherens Junctions; RhoA Signaling; RhoGDI Signaling; Signaling by Rho Family GTPases                                            |
| Actin-related protein 2/3 complex subunit 4             | Arpc4     |       | Cytoplasm       |   | other                 | Actin Cytoskeleton Signaling; Actin Nucleation by ARP-WASP Complex; Axonal Guidance Signaling; CD28 Signaling in T Helper Cells; Cdc42 Signaling; Clathrin-mediated Endocytosis Signaling; Ephrin Receptor Signaling; Epithelial Adherens Junction Signaling; Fcγ Receptor-mediated Phagocytosis in Macrophages and Monocytes; fMLP Signaling in Neutrophils; Integrin Signaling; Rac Signaling; Regulation of Actin-based Motility by Rho; Remodeling of Epithelial Adherens Junctions; RhoA Signaling; RhoGDI Signaling; Signaling by Rho Family GTPases                                            |
| Actin-related protein 2/3 complex subunit 5             | Arpc5     |       | Cytoplasm       |   | other                 | Actin Cytoskeleton Signaling; Actin Nucleation by ARP-WASP Complex; Axonal Guidance Signaling; CD28 Signaling in T Helper Cells; Cdc42 Signaling; Clathrin-mediated Endocytosis Signaling; Corticotropin Releasing Hormone Signaling; Ephrin Receptor Signaling; Epithelial Adherens Junction Signaling; Fcγ Receptor-mediated Phagocytosis in Macrophages and Monocytes; fMLP Signaling in Neutrophils; Integrin Signaling; Rac Signaling; Regulation of Actin-based Motility by Rho; Remodeling of Epithelial Adherens Junctions; RhoA Signaling; RhoGDI Signaling; Signaling by Rho Family GTPases |
| Activating signal cointegrator 1 complex subunit 3      | Ascc3     |       | Cytoplasm       | Y | enzyme                |                                                                                                                                                                                                                                                                                                                                                                                                                                                                                                                                                                                                       |
| Sodium/potassium-transporting ATPase subunit alpha-1    | Atp1a1    | 5     | Plasma Membrane | Y | transporter           |                                                                                                                                                                                                                                                                                                                                                                                                                                                                                                                                                                                                       |
| Sodium/potassium-transporting ATPase subunit beta-3     | Atp1b3    |       | Plasma Membrane |   | transporter           |                                                                                                                                                                                                                                                                                                                                                                                                                                                                                                                                                                                                       |
| ATP synthase subunit alpha, mitochondrial               | Atp5a1    | 5,6,7 | Cytoplasm       | Y | transporter           |                                                                                                                                                                                                                                                                                                                                                                                                                                                                                                                                                                                                       |
| Ataxin-7                                                | Atxn7     |       | Nucleus         |   | peptidase             |                                                                                                                                                                                                                                                                                                                                                                                                                                                                                                                                                                                                       |
| Beta-1,4-galactosyltransferase 1                        | B4galt1   |       | Cytoplasm       |   | enzyme                |                                                                                                                                                                                                                                                                                                                                                                                                                                                                                                                                                                                                       |
| Basic leucine zipper and W2 domain-containing protein 1 | Bzw1      |       | Cytoplasm       | Y | translation regulator |                                                                                                                                                                                                                                                                                                                                                                                                                                                                                                                                                                                                       |

|                                          |        |     |                 |   |                         |                                                                                                                                                                                                                                                                                                                                                                                                                                                                                                    |
|------------------------------------------|--------|-----|-----------------|---|-------------------------|----------------------------------------------------------------------------------------------------------------------------------------------------------------------------------------------------------------------------------------------------------------------------------------------------------------------------------------------------------------------------------------------------------------------------------------------------------------------------------------------------|
| Calreticulin                             | Calr   | 6   | Cytoplasm       |   | transcription regulator |                                                                                                                                                                                                                                                                                                                                                                                                                                                                                                    |
| Adenylyl cyclase-associated protein 1    | Cap1   | 6   | Plasma Membrane | Y | other                   | Ephrin B Signaling                                                                                                                                                                                                                                                                                                                                                                                                                                                                                 |
| F-actin-capping protein subunit alpha-1  | Capza1 |     | Cytoplasm       | Y | other                   |                                                                                                                                                                                                                                                                                                                                                                                                                                                                                                    |
| F-actin-capping protein subunit beta     | Capzb  |     | Cytoplasm       | Y | other                   |                                                                                                                                                                                                                                                                                                                                                                                                                                                                                                    |
| T-complex protein 1 subunit beta         | Cct2   | 6   | Cytoplasm       | Y | kinase                  |                                                                                                                                                                                                                                                                                                                                                                                                                                                                                                    |
| T-complex protein 1 subunit delta        | Cct4   | 6   | Cytoplasm       | Y | other                   |                                                                                                                                                                                                                                                                                                                                                                                                                                                                                                    |
| T-complex protein 1 subunit zeta         | Cct6a  | 6   | Cytoplasm       | Y | other                   |                                                                                                                                                                                                                                                                                                                                                                                                                                                                                                    |
| T-complex protein 1 subunit eta          | Cct7   |     | Cytoplasm       |   | other                   | NRF2-mediated Oxidative Stress Response                                                                                                                                                                                                                                                                                                                                                                                                                                                            |
| T-complex protein 1 subunit theta        | Cct8   | 6   | Cytoplasm       | Y | enzyme                  |                                                                                                                                                                                                                                                                                                                                                                                                                                                                                                    |
| Leukocyte surface antigen CD47           | Cd47   |     | Plasma Membrane | Y | transmembrane receptor  |                                                                                                                                                                                                                                                                                                                                                                                                                                                                                                    |
| Cell division control protein 42 homolog | Cdc42  |     | Plasma Membrane | Y | enzyme                  |                                                                                                                                                                                                                                                                                                                                                                                                                                                                                                    |
| Cofilin-1                                | Cfl1   | 2,6 | Nucleus         | Y | other                   | Actin Cytoskeleton Signaling; Axonal Guidance Signaling; B Cell Receptor Signaling; CCR3 Signaling in Eosinophils; Cdc42 Signaling; Chemokine Signaling; Ephrin A Signaling; Ephrin B Signaling; Ephrin Receptor Signaling; Germ Cell-Sertoli Cell Junction Signaling; ILK Signaling; PAK Signaling; Rac Signaling; Regulation of Actin-based Motility by Rho; RhoA Signaling; RhoGDI Signaling; Role of Tissue Factor in Cancer; Semaphorin Signaling in Neurons; Signaling by Rho Family GTPases |
| Cytoskeleton-associated protein 5        | Ckap5  | 5,6 | Nucleus         | Y | transcription regulator |                                                                                                                                                                                                                                                                                                                                                                                                                                                                                                    |
| Clathrin heavy chain 1                   | Cltc   | 1,6 | Plasma Membrane | Y | other                   | Clathrin-mediated Endocytosis Signaling; CTLA4 Signaling in Cytotoxic T Lymphocytes; Huntington's Disease Signaling; Virus Entry via Endocytic Pathways                                                                                                                                                                                                                                                                                                                                            |
| Cytosolic non-specific dipeptidase       | Cndp2  |     | Cytoplasm       | Y | peptidase               |                                                                                                                                                                                                                                                                                                                                                                                                                                                                                                    |
| Coatomer subunit alpha                   | Copa   |     | Cytoplasm       | Y | transporter             |                                                                                                                                                                                                                                                                                                                                                                                                                                                                                                    |
| Coronin-1A                               | Coro1a |     | Cytoplasm       | Y | other                   |                                                                                                                                                                                                                                                                                                                                                                                                                                                                                                    |
| Coronin-1C                               | Coro1c | 6   | Cytoplasm       |   | other                   |                                                                                                                                                                                                                                                                                                                                                                                                                                                                                                    |
| Coronin-7                                | Coro7  | 1,6 | Cytoplasm       | Y | other                   |                                                                                                                                                                                                                                                                                                                                                                                                                                                                                                    |
| Calsyntenin-1                            | Cs     |     | Cytoplasm       | Y | enzyme                  | TCA Cycle II (Eukaryotic)                                                                                                                                                                                                                                                                                                                                                                                                                                                                          |
| Exportin-2                               | Cse11  | 6   | Nucleus         | Y | transporter             |                                                                                                                                                                                                                                                                                                                                                                                                                                                                                                    |

|                                                           |          |        |           |   |                       |                                                                                                                                                                                                                                           |
|-----------------------------------------------------------|----------|--------|-----------|---|-----------------------|-------------------------------------------------------------------------------------------------------------------------------------------------------------------------------------------------------------------------------------------|
| Small muscular protein                                    | Csl      |        | Cytoplasm |   | enzyme                |                                                                                                                                                                                                                                           |
| Casein kinase II subunit alpha                            | Csnk2a1  | 2      | Nucleus   | Y | kinase                | Amyloid Processing; Clathrin-mediated Endocytosis Signaling; EGF Signaling; IGF-1 Signaling; IL-2 Signaling; IL-6 Signaling; NF-κB Signaling; PDGF Signaling; PTEN Signaling; RAR Activation; VDR/RXR Activation; Wnt/β-catenin Signaling |
| Chymotrypsinogen B                                        | Ctrb1    |        | Cytoplasm | Y | peptidase             |                                                                                                                                                                                                                                           |
| Cytoplasmic FMR1-interacting protein 2                    | Cyfp2    | 1b,5,6 | Cytoplasm |   | other                 | Actin Cytoskeleton Signaling; Rac Signaling                                                                                                                                                                                               |
| Aspartate--tRNA ligase, cytoplasmic                       | Dars     | 6      | Cytoplasm | Y | enzyme                | tRNA Charging                                                                                                                                                                                                                             |
| Probable ATP-dependent RNA helicase DDX17                 | Ddx17    | 1,6    | Nucleus   | Y | enzyme                |                                                                                                                                                                                                                                           |
| ATP-dependent RNA helicase DDX39A                         | Ddx39a   | 6      |           | Y |                       |                                                                                                                                                                                                                                           |
| Spliceosome RNA helicase Ddx39b                           | Ddx39b   | 6      | Nucleus   | Y | enzyme                |                                                                                                                                                                                                                                           |
| Probable ATP-dependent RNA helicase DDX5                  | Ddx5     | 6      | Nucleus   | Y | enzyme                | Estrogen Receptor Signaling                                                                                                                                                                                                               |
| Pre-mRNA-splicing factor ATP-dependent RNA helicase DHX15 | Dhx15    | 1,6    | Nucleus   | Y | enzyme                |                                                                                                                                                                                                                                           |
| ATP-dependent RNA helicase DHX8                           | Dhx8     |        | Nucleus   | Y | enzyme                |                                                                                                                                                                                                                                           |
| ATP-dependent RNA helicase A                              | Dhx9     | 1b     | Nucleus   | Y | enzyme                |                                                                                                                                                                                                                                           |
| Elongation factor 1-beta                                  | Eef1b    |        |           | Y |                       |                                                                                                                                                                                                                                           |
| Elongation factor 1-beta                                  | Eef1b2   | 6      | Cytoplasm |   | translation regulator |                                                                                                                                                                                                                                           |
| Elongation factor 1-delta                                 | Eef1d    | 6      | Cytoplasm | Y | translation regulator |                                                                                                                                                                                                                                           |
| Elongation factor 1-gamma                                 | Eef1g    | 6      | Cytoplasm |   | translation regulator |                                                                                                                                                                                                                                           |
| Elongation factor 2                                       | Eef2     | 6      | Cytoplasm | Y | translation regulator |                                                                                                                                                                                                                                           |
| 116 kDa U5 small nuclear ribonucleoprotein component      | Eftud2   | 6      | Nucleus   | Y | enzyme                | Systemic Lupus Erythematosus Signaling                                                                                                                                                                                                    |
| Enolase 1, alpha non-neuron                               | EG433182 |        |           |   |                       |                                                                                                                                                                                                                                           |
| Eukaryotic translation initiation factor 2 subunit 1      | Eif2s1   | 5      | Cytoplasm | Y | translation regulator |                                                                                                                                                                                                                                           |

|                                                      |         |       |                     |   |                         |                                                                                                                                                                                                                                                                                                                                      |
|------------------------------------------------------|---------|-------|---------------------|---|-------------------------|--------------------------------------------------------------------------------------------------------------------------------------------------------------------------------------------------------------------------------------------------------------------------------------------------------------------------------------|
| Eukaryotic translation initiation factor 3 subunit A | Eif3a   | 6     | Cytoplasm           | Y | other                   | EIF2 Signaling; mTOR Signaling; Regulation of eIF4 and p70S6K Signaling                                                                                                                                                                                                                                                              |
| Eukaryotic translation initiation factor 3 subunit L | Eif3l   | 6     | Cytoplasm           |   | other                   | EIF2 Signaling; mTOR Signaling; Regulation of eIF4 and p70S6K Signaling                                                                                                                                                                                                                                                              |
| Eukaryotic initiation factor 4A-I                    | Eif4a1  | 2,6   | Cytoplasm           | Y | translation regulator   |                                                                                                                                                                                                                                                                                                                                      |
| Eukaryotic translation initiation factor 5A-1        | Eif5a   | 6     | Cytoplasm           |   | translation regulator   |                                                                                                                                                                                                                                                                                                                                      |
| Eukaryotic translation initiation factor 6           | Eif6    | 6     | Cytoplasm           | Y | translation regulator   |                                                                                                                                                                                                                                                                                                                                      |
| Alpha-enolase                                        | Eno1    | 6     | Cytoplasm           | Y | enzyme                  | Gluconeogenesis I; Glycolysis I; TR/RXR Activation                                                                                                                                                                                                                                                                                   |
| E1A-binding protein p400                             | Ep400   | 1,5,6 | Nucleus             | Y | other                   |                                                                                                                                                                                                                                                                                                                                      |
| Endoplasmic reticulum aminopeptidase 1               | Erap1   |       | Extracellular Space |   | peptidase               |                                                                                                                                                                                                                                                                                                                                      |
| S-formylglutathione hydrolase                        | Esd     |       | Cytoplasm           |   | enzyme                  | Formaldehyde Oxidation II (Glutathione-dependent); Retinol Biosynthesis; Xenobiotic Metabolism Signaling                                                                                                                                                                                                                             |
| Ezrin                                                | Ezr     | 6     | Plasma Membrane     | Y | other                   | Actin Cytoskeleton Signaling; Agranulocyte Adhesion and Diapedesis; Fcγ Receptor-mediated Phagocytosis in Macrophages and Monocytes; Granulocyte Adhesion and Diapedesis; Leukocyte Extravasation Signaling; Regulation of Cellular Mechanics by Calpain Protease; RhoA Signaling; RhoGDI Signaling; Signaling by Rho Family GTPases |
| Filamin-A                                            | Flna    | 6     | Cytoplasm           | Y | other                   | Actin Cytoskeleton Signaling; Caveolar-mediated Endocytosis Signaling; ILK Signaling; Protein Kinase A Signaling; Virus Entry via Endocytic Pathways                                                                                                                                                                                 |
| Forkhead box protein O1                              | Foxo1   | 1,6   | Nucleus             | Y | transcription regulator |                                                                                                                                                                                                                                                                                                                                      |
| Fibrous sheath-interacting protein 2                 | Fsip2   |       | Cytoplasm           | Y | other                   |                                                                                                                                                                                                                                                                                                                                      |
| Glyceraldehyde-3-phosphate dehydrogenase             | Gapdh   | 2,6   | Cytoplasm           | Y | enzyme                  | Gluconeogenesis I; Glycolysis I; Maturity Onset Diabetes of Young (MODY) Signaling; NADH Repair                                                                                                                                                                                                                                      |
| Glyceraldehyde-3-phosphate dehydrogenase             | GAPDH   | 2,6   |                     | Y |                         |                                                                                                                                                                                                                                                                                                                                      |
| Glycine--tRNA ligase                                 | Gars    | 6     | Cytoplasm           | Y | enzyme                  | tRNA Charging                                                                                                                                                                                                                                                                                                                        |
| Rab GDP dissociation inhibitor beta                  | Gdi2    | 6     | Cytoplasm           | Y | other                   | RhoGDI Signaling; Sumoylation Pathway                                                                                                                                                                                                                                                                                                |
| GTPase IMAP family member 4                          | Gimap4  |       | Nucleus             |   | other                   |                                                                                                                                                                                                                                                                                                                                      |
| GTPase, IMAP family member 7                         | Gimap7  |       | Cytoplasm           |   | enzyme                  |                                                                                                                                                                                                                                                                                                                                      |
| Uncharacterized protein                              | Gm11214 |       | Other               |   | other                   |                                                                                                                                                                                                                                                                                                                                      |

|                                                                  |         |   |                 |   |        |                                                                                                                                                                                                                                                                                                                                                                                                                                                                                                                                                                                                                                                                                                                                                                                                                                                                                                                                                                                                                                                                                                                                                                                                                                                                                                                                                                                                    |
|------------------------------------------------------------------|---------|---|-----------------|---|--------|----------------------------------------------------------------------------------------------------------------------------------------------------------------------------------------------------------------------------------------------------------------------------------------------------------------------------------------------------------------------------------------------------------------------------------------------------------------------------------------------------------------------------------------------------------------------------------------------------------------------------------------------------------------------------------------------------------------------------------------------------------------------------------------------------------------------------------------------------------------------------------------------------------------------------------------------------------------------------------------------------------------------------------------------------------------------------------------------------------------------------------------------------------------------------------------------------------------------------------------------------------------------------------------------------------------------------------------------------------------------------------------------------|
| Uncharacterized protein                                          | Gm18025 |   | Other           |   | other  |                                                                                                                                                                                                                                                                                                                                                                                                                                                                                                                                                                                                                                                                                                                                                                                                                                                                                                                                                                                                                                                                                                                                                                                                                                                                                                                                                                                                    |
| Nucleoside diphosphate kinase                                    | Gm20390 |   |                 |   |        |                                                                                                                                                                                                                                                                                                                                                                                                                                                                                                                                                                                                                                                                                                                                                                                                                                                                                                                                                                                                                                                                                                                                                                                                                                                                                                                                                                                                    |
| Heterogeneous nuclear ribonucleoprotein U                        | Gm28062 |   |                 |   |        |                                                                                                                                                                                                                                                                                                                                                                                                                                                                                                                                                                                                                                                                                                                                                                                                                                                                                                                                                                                                                                                                                                                                                                                                                                                                                                                                                                                                    |
| Ganglioside GM2 activator                                        | Gm2a    |   | Cytoplasm       |   | enzyme | Chondroitin Sulfate Degradation (Metazoa); Dermatan Sulfate Degradation (Metazoa)                                                                                                                                                                                                                                                                                                                                                                                                                                                                                                                                                                                                                                                                                                                                                                                                                                                                                                                                                                                                                                                                                                                                                                                                                                                                                                                  |
| Uncharacterized protein                                          | Gm43738 |   |                 |   |        |                                                                                                                                                                                                                                                                                                                                                                                                                                                                                                                                                                                                                                                                                                                                                                                                                                                                                                                                                                                                                                                                                                                                                                                                                                                                                                                                                                                                    |
| Uncharacterized protein                                          | Gm5786  |   | Other           |   | other  |                                                                                                                                                                                                                                                                                                                                                                                                                                                                                                                                                                                                                                                                                                                                                                                                                                                                                                                                                                                                                                                                                                                                                                                                                                                                                                                                                                                                    |
| Uncharacterized protein                                          | Gm6576  |   | Other           |   | other  |                                                                                                                                                                                                                                                                                                                                                                                                                                                                                                                                                                                                                                                                                                                                                                                                                                                                                                                                                                                                                                                                                                                                                                                                                                                                                                                                                                                                    |
| EG627828 protein                                                 | Gm6793  |   | Other           |   | other  |                                                                                                                                                                                                                                                                                                                                                                                                                                                                                                                                                                                                                                                                                                                                                                                                                                                                                                                                                                                                                                                                                                                                                                                                                                                                                                                                                                                                    |
| Uncharacterized protein                                          | Gm8394  |   | Other           |   | other  |                                                                                                                                                                                                                                                                                                                                                                                                                                                                                                                                                                                                                                                                                                                                                                                                                                                                                                                                                                                                                                                                                                                                                                                                                                                                                                                                                                                                    |
| Uncharacterized protein                                          | Gm9242  |   | Other           |   | other  |                                                                                                                                                                                                                                                                                                                                                                                                                                                                                                                                                                                                                                                                                                                                                                                                                                                                                                                                                                                                                                                                                                                                                                                                                                                                                                                                                                                                    |
| Uncharacterized protein                                          | Gm9493  |   | Cytoplasm       |   | other  |                                                                                                                                                                                                                                                                                                                                                                                                                                                                                                                                                                                                                                                                                                                                                                                                                                                                                                                                                                                                                                                                                                                                                                                                                                                                                                                                                                                                    |
| Guanine nucleotide-binding protein G(k) subunit alpha            | Gnai3   | 5 | Cytoplasm       |   | enzyme | Agranulocyte Adhesion and Diapedesis; Androgen Signaling; Axonal Guidance Signaling; Breast Cancer Regulation by Stathmin1; cAMP-mediated signaling; Cardiac Hypertrophy Signaling; CCR3 Signaling in Eosinophils; CCR5 Signaling in Macrophages; Chemokine Signaling; Corticotropin Releasing Hormone Signaling; CREB Signaling in Neurons; CXCR4 Signaling; Dopamine-DARPP32 Feedback in cAMP Signaling; Endothelin-1 Signaling; Ephrin B Signaling; Ephrin Receptor Signaling; fMLP Signaling in Neutrophils; Gap Junction Signaling; G Beta Gamma Signaling; GNRH Signaling; GPCR-Mediated Integration of Enteroendocrine Signaling Exemplified by an L Cell; GPCR-Mediated Nutrient Sensing in Enteroendocrine Cells; G-Protein Coupled Receptor Signaling; Granulocyte Adhesion and Diapedesis; Gαi Signaling; IL-1 Signaling; IL-8 Signaling; Leukocyte Extravasation Signaling; Melatonin Signaling; Molecular Mechanisms of Cancer; P2Y Purigenic Receptor Signaling Pathway; p70S6K Signaling; Protein Kinase A Signaling; Relaxin Signaling; RhoGDI Signaling; Role of NFAT in Cardiac Hypertrophy; Role of NFAT in Regulation of the Immune Response; Role of PI3K/AKT Signaling in the Pathogenesis of Influenza; Signaling by Rho Family GTPases; Sphingosine-1-phosphate Signaling; Synaptic Long Term Depression; Tec Kinase Signaling; Thrombin Signaling; α-Adrenergic Signaling |
| Guanine nucleotide-binding protein G(I)/G(S)/G(T) subunit beta-2 | Gnb2    |   | Plasma Membrane | Y | enzyme | Androgen Signaling; Antiproliferative Role of Somatostatin Receptor 2; Axonal Guidance Signaling; Breast Cancer Regulation by Stathmin1; Cardiac Hypertrophy Signaling; Cardiac β-adrenergic Signaling; CCR3 Signaling in Eosinophils; CCR5 Signaling in Macrophages; Colorectal Cancer Metastasis Signaling; CREB Signaling in Neurons; CXCR4 Signaling; Ephrin B Signaling; Ephrin Receptor Signaling; fMLP Signaling in Neutrophils; G Beta Gamma Signaling; G Protein Signaling Mediated by Tubby; Gαi Signaling; Gαq Signaling; Gas Signaling; Huntington's Disease Signaling; IL-1 Signaling; IL-8 Signaling; P2Y Purigenic Receptor Signaling Pathway; Phospholipase C Signaling; Protein Kinase A Signaling; Relaxin                                                                                                                                                                                                                                                                                                                                                                                                                                                                                                                                                                                                                                                                       |



|                                                         |          |      |                 |   |           |                                                                                                                                                                                                                                                                                                                                                                                                                                                                                                                                                                                                                                                                                                                                                                                                                                                                                                                                                                                                                                                                                                                                                      |
|---------------------------------------------------------|----------|------|-----------------|---|-----------|------------------------------------------------------------------------------------------------------------------------------------------------------------------------------------------------------------------------------------------------------------------------------------------------------------------------------------------------------------------------------------------------------------------------------------------------------------------------------------------------------------------------------------------------------------------------------------------------------------------------------------------------------------------------------------------------------------------------------------------------------------------------------------------------------------------------------------------------------------------------------------------------------------------------------------------------------------------------------------------------------------------------------------------------------------------------------------------------------------------------------------------------------|
|                                                         |          |      |                 |   |           | Signaling; RhoGDI Signaling; Role of NFAT in Cardiac Hypertrophy; Role of NFAT in Regulation of the Immune Response; Signaling by Rho Family GTPases; Tec Kinase Signaling; Thrombin Signaling; $\alpha$ -Adrenergic Signaling                                                                                                                                                                                                                                                                                                                                                                                                                                                                                                                                                                                                                                                                                                                                                                                                                                                                                                                       |
| Aspartate aminotransferase, mitochondrial               | Got2     | 6    | Cytoplasm       | Y | enzyme    | Aspartate Biosynthesis; Aspartate Degradation II; Glutamate Degradation II; L-cysteine Degradation I; Phenylalanine Degradation IV (Mammalian, via Side Chain); PPAR $\alpha$ /RXR $\alpha$ Activation; Superpathway of Methionine Degradation                                                                                                                                                                                                                                                                                                                                                                                                                                                                                                                                                                                                                                                                                                                                                                                                                                                                                                       |
| Glucose-6-phosphate isomerase                           | Gpi      | 6    |                 | Y |           |                                                                                                                                                                                                                                                                                                                                                                                                                                                                                                                                                                                                                                                                                                                                                                                                                                                                                                                                                                                                                                                                                                                                                      |
| Glutathione S-transferase P 1                           | Gstp1    | 1b,6 | Cytoplasm       | Y | enzyme    | Aryl Hydrocarbon Receptor Signaling; Glutathione-mediated Detoxification; Glutathione Redox Reactions I; LPS/IL-1 Mediated Inhibition of RXR Function; NRF2-mediated Oxidative Stress Response; Prostate Cancer Signaling; Xenobiotic Metabolism Signaling                                                                                                                                                                                                                                                                                                                                                                                                                                                                                                                                                                                                                                                                                                                                                                                                                                                                                           |
| GTP-binding protein 1                                   | Gtpbp1   | 6    | Cytoplasm       | Y | enzyme    |                                                                                                                                                                                                                                                                                                                                                                                                                                                                                                                                                                                                                                                                                                                                                                                                                                                                                                                                                                                                                                                                                                                                                      |
| Granzyme B(G,H)                                         | Gzmb     |      | Cytoplasm       |   | peptidase | Allograft Rejection Signaling; Autoimmune Thyroid Disease Signaling; Cytotoxic T Lymphocyte-mediated Apoptosis of Target Cells; Graft-versus-Host Disease Signaling; Granzyme B Signaling; Tumoricidal Function of Hepatic Natural Killer Cells; Type I Diabetes Mellitus Signaling                                                                                                                                                                                                                                                                                                                                                                                                                                                                                                                                                                                                                                                                                                                                                                                                                                                                  |
| H-2 class I histocompatibility antigen, K-B alpha chain | H2-K1    |      | Plasma Membrane | Y | other     | Allograft Rejection Signaling; Altered T Cell and B Cell Signaling in Rheumatoid Arthritis; Antigen Presentation Pathway; Autoimmune Thyroid Disease Signaling; B Cell Development; Calcium-induced T Lymphocyte Apoptosis; Caveolar-mediated Endocytosis Signaling; CD28 Signaling in T Helper Cells; Cdc42 Signaling; Communication between Innate and Adaptive Immune Cells; Crosstalk between Dendritic Cells and Natural Killer Cells; CTLA4 Signaling in Cytotoxic T Lymphocytes; Cytotoxic T Lymphocyte-mediated Apoptosis of Target Cells; Dendritic Cell Maturation; Graft-versus-Host Disease Signaling; iCOS-iCOSL Signaling in T Helper Cells; IL-4 Signaling; Neuroprotective Role of THOP1 in Alzheimer's Disease; Nur77 Signaling in T Lymphocytes; OX40 Signaling Pathway; Phagosome Maturation; PKC $\theta$ Signaling in T Lymphocytes; Protein Ubiquitination Pathway; Role of NFAT in Regulation of the Immune Response; Systemic Lupus Erythematosus Signaling; Th1 and Th2 Activation Pathway; Th1 Pathway; Th2 Pathway; T Helper Cell Differentiation; Type I Diabetes Mellitus Signaling; Virus Entry via Endocytic Pathways |
| Histone H2A.J                                           | H2afj    |      | Cytoplasm       | Y | other     |                                                                                                                                                                                                                                                                                                                                                                                                                                                                                                                                                                                                                                                                                                                                                                                                                                                                                                                                                                                                                                                                                                                                                      |
| Histone H3.3                                            | H3f3a    |      | Nucleus         | Y | other     | ERK/MAPK Signaling; Estrogen Receptor Signaling; p38 MAPK Signaling; Protein Kinase A Signaling; UVB-Induced MAPK Signaling                                                                                                                                                                                                                                                                                                                                                                                                                                                                                                                                                                                                                                                                                                                                                                                                                                                                                                                                                                                                                          |
| Trifunctional enzyme subunit alpha, mitochondrial       | Hadha    | 1b   | Cytoplasm       | Y | enzyme    | Fatty Acid $\beta$ -oxidation I; Glutaryl-CoA Degradation; Isoleucine Degradation I; Ketogenesis; Ketolysis; Mevalonate Pathway I; Superpathway of Cholesterol Biosynthesis; Superpathway of Geranylgeranyldiphosphate Biosynthesis I (via Mevalonate); Tryptophan Degradation III (Eukaryotic); Valine Degradation I                                                                                                                                                                                                                                                                                                                                                                                                                                                                                                                                                                                                                                                                                                                                                                                                                                |
| Beta-hexosaminidase subunit beta                        | Hexb     |      | Cytoplasm       |   | enzyme    | Chondroitin Sulfate Degradation (Metazoa); Dermatan Sulfate Degradation (Metazoa)                                                                                                                                                                                                                                                                                                                                                                                                                                                                                                                                                                                                                                                                                                                                                                                                                                                                                                                                                                                                                                                                    |
| Histone H1.4                                            | Hist1h1e |      | Nucleus         | Y | other     | Granzyme A Signaling; Protein Kinase A Signaling                                                                                                                                                                                                                                                                                                                                                                                                                                                                                                                                                                                                                                                                                                                                                                                                                                                                                                                                                                                                                                                                                                     |
| Histone H2A                                             | Hist1h2  |      | Nucleus         |   | other     |                                                                                                                                                                                                                                                                                                                                                                                                                                                                                                                                                                                                                                                                                                                                                                                                                                                                                                                                                                                                                                                                                                                                                      |

|                                                |           |     |         |   |                         |                                                                          |
|------------------------------------------------|-----------|-----|---------|---|-------------------------|--------------------------------------------------------------------------|
|                                                | aa        |     |         |   |                         |                                                                          |
| Histone H2A type 1                             | Hist1h2ad |     | Nucleus | Y | other                   |                                                                          |
| Histone H2A type 1-F                           | Hist1h2af |     | Nucleus | Y | other                   |                                                                          |
| Histone H2A type 1-H                           | Hist1h2ah |     | Nucleus | Y | other                   |                                                                          |
| Histone H2A type 1-K                           | Hist1h2ak |     | Nucleus | Y | other                   |                                                                          |
| Histone H2A type 1                             | Hist1h2ao |     | Nucleus | Y | other                   |                                                                          |
| Histone H4                                     | Hist2h4   |     | Nucleus | Y | other                   |                                                                          |
| Histone H2A type 3                             | Hist3h2a  |     | Nucleus | Y | other                   |                                                                          |
| Histone H4                                     | Hist4h4   |     | Nucleus | Y | other                   |                                                                          |
| Heterogeneous nuclear ribonucleoprotein A0     | Hnrnpa0   | 5,6 | Nucleus | Y | other                   |                                                                          |
| Heterogeneous nuclear ribonucleoproteins A2/B1 | Hnrnpa2b1 | 6   | Nucleus | Y | other                   | Systemic Lupus Erythematosus Signaling; Telomere Extension by Telomerase |
| Heterogeneous nuclear ribonucleoprotein A3     | Hnrnpa3   | 5,6 | Nucleus | Y | transporter             |                                                                          |
| Heterogeneous nuclear ribonucleoprotein A/B    | Hnrnpab   | 6   | Nucleus | Y | enzyme                  |                                                                          |
| Heterogeneous nuclear ribonucleoproteins C1/C2 | Hnrnpc    | 6   | Nucleus | Y | other                   | Systemic Lupus Erythematosus Signaling                                   |
| Heterogeneous nuclear ribonucleoprotein D0     | Hnrnpd    |     | Nucleus | Y | transcription regulator |                                                                          |
| Heterogeneous nuclear ribonucleoprotein F      | Hnrnpf    | 1,6 | Nucleus | Y | other                   |                                                                          |
| Heterogeneous nuclear ribonucleoprotein H      | Hnrnph1   | 6   | Nucleus | Y | other                   |                                                                          |
| Heterogeneous nuclear ribonucleoprotein K      | Hnrnpk    | 6   | Nucleus | Y | transcription regulator |                                                                          |
| Heterogeneous nuclear ribonucleoprotein L      | Hnrnpl    | 1,6 | Nucleus | Y | other                   |                                                                          |
| Heterogeneous nuclear ribonucleoprotein M      | Hnrnpm    | 6   | Nucleus | Y | other                   |                                                                          |

|                                                          |          |     |                 |   |                         |                                                                                                                                                                                                                                                                                                                                                                                                         |
|----------------------------------------------------------|----------|-----|-----------------|---|-------------------------|---------------------------------------------------------------------------------------------------------------------------------------------------------------------------------------------------------------------------------------------------------------------------------------------------------------------------------------------------------------------------------------------------------|
| Heterogeneous nuclear ribonucleoprotein U                | Hnrnpu   | 6   | Nucleus         | Y | transporter             |                                                                                                                                                                                                                                                                                                                                                                                                         |
| Heterogeneous nuclear ribonucleoprotein U-like protein 2 | Hnrnpul2 | 6   | Nucleus         | Y | other                   |                                                                                                                                                                                                                                                                                                                                                                                                         |
| 3-hydroxyacyl-CoA dehydrogenase type-2                   | Hsd17b10 | 1,6 | Cytoplasm       |   | enzyme                  | Estrogen Biosynthesis; Estrogen-Dependent Breast Cancer Signaling; Ethanol Degradation II; Fatty Acid $\beta$ -oxidation I; Glutaryl-CoA Degradation; Isoleucine Degradation I; Mitochondrial Dysfunction; Noradrenaline and Adrenaline Degradation; Serotonin Degradation; Tryptophan Degradation III (Eukaryotic)                                                                                     |
| Heat shock 70 kDa protein 4                              | Hspa4    | 6   | Cytoplasm       | Y | other                   | Aldosterone Signaling in Epithelial Cells; Androgen Signaling; eNOS Signaling; Glucocorticoid Receptor Signaling; Huntington's Disease Signaling; Protein Ubiquitination Pathway; Unfolded protein response                                                                                                                                                                                             |
| 78 kDa glucose-regulated protein                         | Hspa5    |     | Cytoplasm       | Y | enzyme                  | Aldosterone Signaling in Epithelial Cells; EIF2 Signaling; Endoplasmic Reticulum Stress Pathway; eNOS Signaling; Glucocorticoid Receptor Signaling; Huntington's Disease Signaling; Protein Ubiquitination Pathway; Unfolded protein response                                                                                                                                                           |
| Heat shock cognate 71 kDa protein                        | Hspa8    | 6   | Cytoplasm       | Y | enzyme                  | Aldosterone Signaling in Epithelial Cells; Clathrin-mediated Endocytosis Signaling; eNOS Signaling; Glucocorticoid Receptor Signaling; Huntington's Disease Signaling; Protein Ubiquitination Pathway; Unfolded protein response                                                                                                                                                                        |
| Stress-70 protein, mitochondrial                         | Hspa9    | 6   | Cytoplasm       | Y | other                   | Aldosterone Signaling in Epithelial Cells; eNOS Signaling; Glucocorticoid Receptor Signaling; Huntington's Disease Signaling; Protein Ubiquitination Pathway; Unfolded protein response                                                                                                                                                                                                                 |
| 60 kDa heat shock protein, mitochondrial                 | Hspd1    | 6   | Cytoplasm       | Y | enzyme                  | Aldosterone Signaling in Epithelial Cells; Protein Ubiquitination Pathway; Type I Diabetes Mellitus Signaling                                                                                                                                                                                                                                                                                           |
| Isoleucine--tRNA ligase, mitochondrial                   | Iars2    | 6   | Cytoplasm       |   | enzyme                  | tRNA Charging                                                                                                                                                                                                                                                                                                                                                                                           |
| Gamma-interferon-inducible lysosomal thiol reductase     | Ifi30    |     | Cytoplasm       |   | enzyme                  |                                                                                                                                                                                                                                                                                                                                                                                                         |
| Inositol monophosphatase 1                               | Impa1    |     | Cytoplasm       |   | phosphatase             |                                                                                                                                                                                                                                                                                                                                                                                                         |
| Inositol monophosphatase 2                               | Impa2    |     | Cytoplasm       |   | phosphatase             |                                                                                                                                                                                                                                                                                                                                                                                                         |
| Insulinoma-associated protein 1                          | Insm1    |     | Nucleus         |   | transcription regulator |                                                                                                                                                                                                                                                                                                                                                                                                         |
| Integrin-alpha FG-GAP repeat-containing protein 2        | Itfg2    |     | Other           | Y | other                   |                                                                                                                                                                                                                                                                                                                                                                                                         |
| Integrin beta-1                                          | Itgb1    |     | Plasma Membrane | Y | transmembrane receptor  |                                                                                                                                                                                                                                                                                                                                                                                                         |
| Integrin beta-2                                          | Itgb2    |     | Plasma Membrane | Y | transmembrane receptor  |                                                                                                                                                                                                                                                                                                                                                                                                         |
| Integrin beta-5                                          | Itgb5    |     | Plasma Membrane | Y | other                   | Caveolar-mediated Endocytosis Signaling; Clathrin-mediated Endocytosis Signaling; Glioma Invasiveness Signaling; HER-2 Signaling in Breast Cancer; IL-8 Signaling; ILK Signaling; Integrin Signaling; Macropinocytosis Signaling; NF- $\kappa$ B Activation by Viruses; Paxillin Signaling; PPAR $\alpha$ /RXR $\alpha$ Activation; Role of Tissue Factor in Cancer; Virus Entry via Endocytic Pathways |

|                                                                      |        |       |                     |   |             |                                                                                                                                                                                                               |
|----------------------------------------------------------------------|--------|-------|---------------------|---|-------------|---------------------------------------------------------------------------------------------------------------------------------------------------------------------------------------------------------------|
| Lysine--tRNA ligase                                                  | Kars   |       | Cytoplasm           | Y | enzyme      | tRNA Charging                                                                                                                                                                                                 |
| Plasma kallikrein                                                    | Klkb1  |       | Extracellular Space |   | peptidase   | Acute Phase Response Signaling; Coagulation System; Intrinsic Prothrombin Activation Pathway; MSP-ROn Signaling Pathway                                                                                       |
| Importin subunit alpha-3                                             | Kpna4  |       | Nucleus             | Y | transporter |                                                                                                                                                                                                               |
| Keratin, type I cuticular Ha1                                        | Krt31  |       | Cytoplasm           |   | other       |                                                                                                                                                                                                               |
| Keratin, type I cuticular Ha3-I                                      | Krt33a |       | Cytoplasm           |   | other       |                                                                                                                                                                                                               |
| Keratin, type I cuticular Ha3-II                                     | Krt33b |       | Cytoplasm           |   | other       |                                                                                                                                                                                                               |
| Keratin, type I cuticular Ha4                                        | Krt34  |       | Cytoplasm           |   | other       |                                                                                                                                                                                                               |
| Keratin, type II cytoskeletal 5                                      | Krt5   | 5,6   | Cytoplasm           | Y | other       |                                                                                                                                                                                                               |
| Lamin-B receptor                                                     | Lbr    | 1,7   | Nucleus             | Y | enzyme      | Cholesterol Biosynthesis I; Cholesterol Biosynthesis II (via 24,25-dihydrolanosterol); Cholesterol Biosynthesis III (via Desmosterol); Superpathway of Cholesterol Biosynthesis; Zymosterol Biosynthesis      |
| Lamin-B1                                                             | Lmnb1  | 6     | Nucleus             | Y | other       | Granzyme B Signaling; Mechanisms of Viral Exit from Host Cells                                                                                                                                                |
| Endoplasmic reticulum mannosyl-oligosaccharide 1,2-alpha-mannosidase | Man1b1 |       | Cytoplasm           | Y | enzyme      |                                                                                                                                                                                                               |
| Matrin-3                                                             | Matr3  | 1,6   | Nucleus             | Y | other       |                                                                                                                                                                                                               |
| DNA replication licensing factor MCM2                                | Mcm2   |       | Nucleus             | Y | enzyme      | Cell Cycle Control of Chromosomal Replication                                                                                                                                                                 |
| Malate dehydrogenase, cytoplasmic                                    | Mdh1   | 6     | Cytoplasm           | Y | enzyme      | Aspartate Degradation II; Gluconeogenesis I; TCA Cycle II (Eukaryotic)                                                                                                                                        |
| Malate dehydrogenase, mitochondrial                                  | Mdh2   | 5,6,7 | Cytoplasm           | Y | enzyme      | Aspartate Degradation II; Gluconeogenesis I; TCA Cycle II (Eukaryotic)                                                                                                                                        |
| Transcription factor E2-alpha                                        | Me2    |       | Cytoplasm           | Y | enzyme      | Gluconeogenesis I                                                                                                                                                                                             |
| Macrophage migration inhibitory factor                               | Mif    | 6     | Extracellular Space |   | cytokine    | Eumelanin Biosynthesis; MIF-mediated Glucocorticoid Regulation; MIF Regulation of Innate Immunity; Role of Macrophages, Fibroblasts and Endothelial Cells in Rheumatoid Arthritis                             |
| DNA mismatch repair protein Msh2                                     | Msh2   | 6     | Nucleus             | Y | enzyme      | Colorectal Cancer Metastasis Signaling; Hereditary Breast Cancer Signaling; Mismatch Repair in Eukaryotes; Ovarian Cancer Signaling; Role of BRCA1 in DNA Damage Response                                     |
| Moesin                                                               | Msn    |       | Plasma Membrane     | Y | other       | Actin Cytoskeleton Signaling; Agranulocyte Adhesion and Diapedesis; Granulocyte Adhesion and Diapedesis; Leukocyte Extravasation Signaling; RhoA Signaling; RhoGDI Signaling; Signaling by Rho Family GTPases |
| C-1-tetrahydrofolate synthase, cytoplasmic                           | Mthfd1 | 6     | Cytoplasm           | Y | enzyme      | Folate Polyglutamylatation; Folate Transformations I; Histidine Degradation III; Tetrahydrofolate Salvage from 5,10-methenyltetrahydrofolate                                                                  |
| Myosin-binding protein C, fast-type                                  | Mybpc2 |       | Cytoplasm           |   | other       |                                                                                                                                                                                                               |
| Myosin-9                                                             | Myh9   | 6     | Cytoplasm           | Y | enzyme      | Actin Cytoskeleton Signaling; Agranulocyte Adhesion and Diapedesis; Calcium Signaling; Cellular Effects                                                                                                       |

|                                             |        |       |           |   |                         |                                                                                                                                                                                                                                                                                                                                                                                                                                                                                                                                                                                                                                 |
|---------------------------------------------|--------|-------|-----------|---|-------------------------|---------------------------------------------------------------------------------------------------------------------------------------------------------------------------------------------------------------------------------------------------------------------------------------------------------------------------------------------------------------------------------------------------------------------------------------------------------------------------------------------------------------------------------------------------------------------------------------------------------------------------------|
|                                             |        |       |           |   |                         | of Sildenafil (Viagra); Epithelial Adherens Junction Signaling; Hepatic Fibrosis / Hepatic Stellate Cell Activation; ILK Signaling; Tight Junction Signaling                                                                                                                                                                                                                                                                                                                                                                                                                                                                    |
| MCG5400                                     | My112a |       | Cytoplasm |   | other                   | Actin Cytoskeleton Signaling; Axonal Guidance Signaling; Cardiac Hypertrophy Signaling; Cdc42 Signaling; Cellular Effects of Sildenafil (Viagra); CXCR4 Signaling; Gα12/13 Signaling; Integrin Signaling; PAK Signaling; Phospholipase C Signaling; Protein Kinase A Signaling; Regulation of Actin-based Motility by Rho; RhoA Signaling; RhoGDI Signaling; Signaling by Rho Family GTPases; Thrombin Signaling                                                                                                                                                                                                                |
| Myosin regulatory light chain 12B           | My112b | 6     | Cytoplasm | Y | other                   | Actin Cytoskeleton Signaling; Axonal Guidance Signaling; Cardiac Hypertrophy Signaling; Cdc42 Signaling; Cellular Effects of Sildenafil (Viagra); CXCR4 Signaling; Gα12/13 Signaling; IL-8 Signaling; Integrin Signaling; PAK Signaling; Phospholipase C Signaling; Protein Kinase A Signaling; Regulation of Actin-based Motility by Rho; RhoA Signaling; RhoGDI Signaling; Signaling by Rho Family GTPases; Thrombin Signaling                                                                                                                                                                                                |
| Myosin regulatory light polypeptide 9       | My19   |       | Cytoplasm | Y | other                   | Actin Cytoskeleton Signaling; Agranulocyte Adhesion and Diapedesis; Axonal Guidance Signaling; Calcium Signaling; Cardiac Hypertrophy Signaling; Cdc42 Signaling; Cellular Effects of Sildenafil (Viagra); CXCR4 Signaling; Epithelial Adherens Junction Signaling; Gα12/13 Signaling; Hepatic Fibrosis / Hepatic Stellate Cell Activation; IL-8 Signaling; ILK Signaling; Integrin Signaling; PAK Signaling; Phospholipase C Signaling; Protein Kinase A Signaling; Regulation of Actin-based Motility by Rho; RhoA Signaling; RhoGDI Signaling; Signaling by Rho Family GTPases; Thrombin Signaling; Tight Junction Signaling |
| Nucleosome assembly protein 1-like 1        | Nap111 | 6     | Nucleus   | Y | other                   |                                                                                                                                                                                                                                                                                                                                                                                                                                                                                                                                                                                                                                 |
| Nuclear receptor corepressor 1              | Ncor1  | 1,5,6 | Nucleus   | Y | transcription regulator |                                                                                                                                                                                                                                                                                                                                                                                                                                                                                                                                                                                                                                 |
| Nuclear transcription factor Y subunit beta | Nfyb   |       | Nucleus   |   | transcription regulator |                                                                                                                                                                                                                                                                                                                                                                                                                                                                                                                                                                                                                                 |
| Nipped-B-like protein                       | Nipbl  | 5,6   | Nucleus   | Y | transcription regulator |                                                                                                                                                                                                                                                                                                                                                                                                                                                                                                                                                                                                                                 |
| Nucleoside diphosphate kinase A             | Nme1   | 6     | Cytoplasm | Y | kinase                  | Granzyme A Signaling; Pyrimidine Deoxyribonucleotides De Novo Biosynthesis I; Pyrimidine Ribonucleotides De Novo Biosynthesis; Pyrimidine Ribonucleotides Interconversion; Remodeling of Epithelial Adherens Junctions; Salvage Pathways of Pyrimidine Ribonucleotides                                                                                                                                                                                                                                                                                                                                                          |
| Nucleoside diphosphate kinase B             | Nme2   |       | Nucleus   |   | kinase                  | Pyrimidine Deoxyribonucleotides De Novo Biosynthesis I; Pyrimidine Ribonucleotides De Novo Biosynthesis; Pyrimidine Ribonucleotides Interconversion; Salvage Pathways of Pyrimidine Ribonucleotides                                                                                                                                                                                                                                                                                                                                                                                                                             |
| Nucleolar protein 56                        | Nop56  | 6     | Nucleus   | Y | other                   |                                                                                                                                                                                                                                                                                                                                                                                                                                                                                                                                                                                                                                 |
| Nucleolar protein 58                        | Nop58  | 1,6   | Nucleus   | Y | enzyme                  |                                                                                                                                                                                                                                                                                                                                                                                                                                                                                                                                                                                                                                 |
| Nitrogen permease regulator 3-like protein  | Nprl3  |       | Other     | Y | other                   |                                                                                                                                                                                                                                                                                                                                                                                                                                                                                                                                                                                                                                 |
| Cytosolic 5'-nucleotidase 3A                | Nt5c   |       | Cytoplasm | Y | phosphatase             |                                                                                                                                                                                                                                                                                                                                                                                                                                                                                                                                                                                                                                 |

|                                                             |          |         |                 |   |             |                                                                                                                                                                                                                                                                                                                                                                                                                                                                                                                                                                                                                                                                                                                                                                                                                                                                                                                                                                                                                                                                                                                                                                                                                                                                           |
|-------------------------------------------------------------|----------|---------|-----------------|---|-------------|---------------------------------------------------------------------------------------------------------------------------------------------------------------------------------------------------------------------------------------------------------------------------------------------------------------------------------------------------------------------------------------------------------------------------------------------------------------------------------------------------------------------------------------------------------------------------------------------------------------------------------------------------------------------------------------------------------------------------------------------------------------------------------------------------------------------------------------------------------------------------------------------------------------------------------------------------------------------------------------------------------------------------------------------------------------------------------------------------------------------------------------------------------------------------------------------------------------------------------------------------------------------------|
| Netrin-G2                                                   | Ntng2    |         | Plasma Membrane |   | other       |                                                                                                                                                                                                                                                                                                                                                                                                                                                                                                                                                                                                                                                                                                                                                                                                                                                                                                                                                                                                                                                                                                                                                                                                                                                                           |
| Nuclear pore complex protein Nup155                         | Nup155   | 6,7     | Nucleus         | Y | transporter |                                                                                                                                                                                                                                                                                                                                                                                                                                                                                                                                                                                                                                                                                                                                                                                                                                                                                                                                                                                                                                                                                                                                                                                                                                                                           |
| Nuclear pore complex protein Nup54                          | Nup54    | 1,2,6   | Nucleus         |   | transporter |                                                                                                                                                                                                                                                                                                                                                                                                                                                                                                                                                                                                                                                                                                                                                                                                                                                                                                                                                                                                                                                                                                                                                                                                                                                                           |
| Nuclear pore glycoprotein p62                               | Nup62    | 1,2,6,7 | Nucleus         | Y | transporter |                                                                                                                                                                                                                                                                                                                                                                                                                                                                                                                                                                                                                                                                                                                                                                                                                                                                                                                                                                                                                                                                                                                                                                                                                                                                           |
| 2-oxoglutarate dehydrogenase, mitochondrial                 | Ogdh     |         | Cytoplasm       | Y | enzyme      | 2-ketoglutarate Dehydrogenase Complex; Mitochondrial Dysfunction; TCA Cycle II (Eukaryotic)                                                                                                                                                                                                                                                                                                                                                                                                                                                                                                                                                                                                                                                                                                                                                                                                                                                                                                                                                                                                                                                                                                                                                                               |
| Protein-arginine deiminase type-2                           | Padi2    |         | Cytoplasm       |   | enzyme      | Protein Citrullination                                                                                                                                                                                                                                                                                                                                                                                                                                                                                                                                                                                                                                                                                                                                                                                                                                                                                                                                                                                                                                                                                                                                                                                                                                                    |
| Platelet-activating factor acetylhydrolase IB subunit alpha | Pafah1b1 |         | Cytoplasm       | Y | enzyme      | Antioxidant Action of Vitamin C; Atherosclerosis Signaling; Eicosanoid Signaling; Endothelin-1 Signaling; Phospholipases; Reelin Signaling in Neurons; Role of MAPK Signaling in the Pathogenesis of Influenza; Sperm Motility; Synaptic Long Term Depression                                                                                                                                                                                                                                                                                                                                                                                                                                                                                                                                                                                                                                                                                                                                                                                                                                                                                                                                                                                                             |
| Protein DJ-1                                                | Park7    | 6       | Nucleus         | Y | enzyme      | Glutaryl-CoA Degradation; Mitochondrial Dysfunction; Parkinson's Signaling; Tryptophan Degradation III (Eukaryotic)                                                                                                                                                                                                                                                                                                                                                                                                                                                                                                                                                                                                                                                                                                                                                                                                                                                                                                                                                                                                                                                                                                                                                       |
| Protein piccolo                                             | Pelo     | 2,5,7   | Cytoplasm       | Y | transporter |                                                                                                                                                                                                                                                                                                                                                                                                                                                                                                                                                                                                                                                                                                                                                                                                                                                                                                                                                                                                                                                                                                                                                                                                                                                                           |
| Protein disulfide-isomerase A3                              | Pdia3    |         | Cytoplasm       | Y | peptidase   | 14-3-3-mediated Signaling; Aldosterone Signaling in Epithelial Cells; Antigen Presentation Pathway; Antioxidant Action of Vitamin C; Axonal Guidance Signaling; Cardiac Hypertrophy Signaling; Cellular Effects of Sildenafil (Viagra); CREB Signaling in Neurons; Dendritic Cell Maturation; Dopamine-DARPP32 Feedback in cAMP Signaling; Endothelin-1 Signaling; Gap Junction Signaling; Glioblastoma Multiforme Signaling; Glutathione Redox Reactions II; GPCR-Mediated Integration of Enteroendocrine Signaling Exemplified by an L Cell; GPCR-Mediated Nutrient Sensing in Enteroendocrine Cells; Leptin Signaling in Obesity; Lipid Antigen Presentation by CD1; Melatonin Signaling; Neuropathic Pain Signaling In Dorsal Horn Neurons; P2Y Purigenic Receptor Signaling Pathway; p70S6K Signaling; Phagosome Formation; Phospholipases; PI3K Signaling in B Lymphocytes; PPAR $\alpha$ /RXR $\alpha$ Activation; Protein Kinase A Signaling; Role of Macrophages, Fibroblasts and Endothelial Cells in Rheumatoid Arthritis; Role of NFAT in Cardiac Hypertrophy; Sperm Motility; Sphingosine-1-phosphate Signaling; Synaptic Long Term Depression; Synaptic Long Term Potentiation; Thrombin Signaling; UVA-Induced MAPK Signaling; Wnt/Ca <sup>+</sup> pathway |
| Phosphatidylethanolamine-binding protein 1                  | Pebp1    | 6       | Cytoplasm       | Y | other       | Phospholipase C Signaling                                                                                                                                                                                                                                                                                                                                                                                                                                                                                                                                                                                                                                                                                                                                                                                                                                                                                                                                                                                                                                                                                                                                                                                                                                                 |
| ATP-dependent 6-phosphofructokinase, platelet type          | Pfkip    |         | Cytoplasm       | Y | kinase      | AMPK Signaling; Glycolysis I; TR/RXR Activation                                                                                                                                                                                                                                                                                                                                                                                                                                                                                                                                                                                                                                                                                                                                                                                                                                                                                                                                                                                                                                                                                                                                                                                                                           |
| Profilin-1                                                  | Pfn1     | 6       | Cytoplasm       | Y | other       | Actin Cytoskeleton Signaling; Axonal Guidance Signaling; Integrin Signaling; PCP pathway; Regulation of Actin-based Motility by Rho; RhoA Signaling                                                                                                                                                                                                                                                                                                                                                                                                                                                                                                                                                                                                                                                                                                                                                                                                                                                                                                                                                                                                                                                                                                                       |
| Phosphoglycerate kinase 1                                   | Pgk1     | 2,6,7   | Cytoplasm       | Y | kinase      | Gluconeogenesis I; Glycolysis I                                                                                                                                                                                                                                                                                                                                                                                                                                                                                                                                                                                                                                                                                                                                                                                                                                                                                                                                                                                                                                                                                                                                                                                                                                           |

|                                                                                   |         |      |                 |   |                         |                                                                                                                                                                                                                                                                                                                                                                                                                                                                                                                                                                                                                                                                                                                                                                                              |
|-----------------------------------------------------------------------------------|---------|------|-----------------|---|-------------------------|----------------------------------------------------------------------------------------------------------------------------------------------------------------------------------------------------------------------------------------------------------------------------------------------------------------------------------------------------------------------------------------------------------------------------------------------------------------------------------------------------------------------------------------------------------------------------------------------------------------------------------------------------------------------------------------------------------------------------------------------------------------------------------------------|
|                                                                                   |         |      | sm              |   |                         |                                                                                                                                                                                                                                                                                                                                                                                                                                                                                                                                                                                                                                                                                                                                                                                              |
| Phosphoglucomutase-2                                                              | Pgm1    | 5    | Cytoplasm       | Y | enzyme                  | GDP-glucose Biosynthesis; Glucose and Glucose-1-phosphate Degradation; Glycogen Degradation II; Glycogen Degradation III                                                                                                                                                                                                                                                                                                                                                                                                                                                                                                                                                                                                                                                                     |
| Phosphoglucomutase-2                                                              | Pgm2    | 5    | Cytoplasm       | Y | enzyme                  | GDP-glucose Biosynthesis; Glucose and Glucose-1-phosphate Degradation; Glycogen Degradation II; Glycogen Degradation III; Purine Ribonucleosides Degradation to Ribose-1-phosphate                                                                                                                                                                                                                                                                                                                                                                                                                                                                                                                                                                                                           |
| Prohibitin-2                                                                      | Phb     |      | Nucleus         | Y | transcription regulator |                                                                                                                                                                                                                                                                                                                                                                                                                                                                                                                                                                                                                                                                                                                                                                                              |
| Pyruvate kinase PKM                                                               | Pkm     | 2    | Cytoplasm       | Y | kinase                  | Glycolysis I; Type II Diabetes Mellitus Signaling                                                                                                                                                                                                                                                                                                                                                                                                                                                                                                                                                                                                                                                                                                                                            |
| Inorganic pyrophosphatase                                                         | Ppa1    | 6    | Cytoplasm       | Y | enzyme                  |                                                                                                                                                                                                                                                                                                                                                                                                                                                                                                                                                                                                                                                                                                                                                                                              |
| Peptidyl-prolyl cis-trans isomerase B                                             | Ppib    | 2,6  | Cytoplasm       |   | enzyme                  | Activation of IRF by Cytosolic Pattern Recognition Receptors; NRF2-mediated Oxidative Stress Response                                                                                                                                                                                                                                                                                                                                                                                                                                                                                                                                                                                                                                                                                        |
| Serine/threonine-protein phosphatase PP1-alpha catalytic subunit                  | Ppp1ca  | 6    | Cytoplasm       | Y | phosphatase             |                                                                                                                                                                                                                                                                                                                                                                                                                                                                                                                                                                                                                                                                                                                                                                                              |
| Protein phosphatase 1 regulatory subunit 7                                        | Ppp1r7  |      | Nucleus         | Y | phosphatase             |                                                                                                                                                                                                                                                                                                                                                                                                                                                                                                                                                                                                                                                                                                                                                                                              |
| Serine/threonine-protein phosphatase 2A 65 kDa regulatory subunit A alpha isoform | Ppp2r1a | 1b,6 | Cytoplasm       |   | phosphatase             |                                                                                                                                                                                                                                                                                                                                                                                                                                                                                                                                                                                                                                                                                                                                                                                              |
| Serine/threonine-protein phosphatase 2A 65 kDa regulatory subunit A beta isoform  | Ppp2r1b | 6    | Plasma Membrane |   | phosphatase             |                                                                                                                                                                                                                                                                                                                                                                                                                                                                                                                                                                                                                                                                                                                                                                                              |
| Serine/threonine-protein phosphatase 2A activator                                 | Ppp2r4  |      |                 |   |                         |                                                                                                                                                                                                                                                                                                                                                                                                                                                                                                                                                                                                                                                                                                                                                                                              |
| Peroxiredoxin-1                                                                   | Prdx1   | 6    | Cytoplasm       | Y | enzyme                  | NRF2-mediated Oxidative Stress Response; Phagosome Maturation                                                                                                                                                                                                                                                                                                                                                                                                                                                                                                                                                                                                                                                                                                                                |
| Peroxiredoxin-6                                                                   | Prdx6   | 6    | Cytoplasm       | Y | enzyme                  | Glutathione Redox Reactions I; Heparan Sulfate Biosynthesis; Heparan Sulfate Biosynthesis (Late Stages); Phagosome Maturation; Triacylglycerol Degradation                                                                                                                                                                                                                                                                                                                                                                                                                                                                                                                                                                                                                                   |
| cAMP-dependent protein kinase type I-alpha regulatory subunit                     | Prkar1a |      | Cytoplasm       | Y | kinase                  | AMPK Signaling; Amyloid Processing; Androgen Signaling; Axonal Guidance Signaling; BMP signaling pathway; Breast Cancer Regulation by Stathmin1; Calcium Signaling; cAMP-mediated signaling; Cardiac Hypertrophy Signaling; Cardiac $\beta$ -adrenergic Signaling; CDK5 Signaling; Cellular Effects of Sildenafil (Viagra); Colorectal Cancer Metastasis Signaling; Corticotropin Releasing Hormone Signaling; CREB Signaling in Neurons; Dopamine-DARPP32 Feedback in cAMP Signaling; Dopamine Receptor Signaling; eNOS Signaling; ERK/MAPK Signaling; Gap Junction Signaling; G Beta Gamma Signaling; GNRH Signaling; GPCR-Mediated Integration of Enteroendocrine Signaling Exemplified by an L Cell; GPCR-Mediated Nutrient Sensing in Enteroendocrine Cells; G-Protein Coupled Receptor |

|                                                  |         |       |                     |   |           |                                                                                                                                                                                                                                                                                                                                                                                                                                                                                                                                                                                                                                                                                                                                                                                                                                                                                                                         |
|--------------------------------------------------|---------|-------|---------------------|---|-----------|-------------------------------------------------------------------------------------------------------------------------------------------------------------------------------------------------------------------------------------------------------------------------------------------------------------------------------------------------------------------------------------------------------------------------------------------------------------------------------------------------------------------------------------------------------------------------------------------------------------------------------------------------------------------------------------------------------------------------------------------------------------------------------------------------------------------------------------------------------------------------------------------------------------------------|
|                                                  |         |       |                     |   |           | Signaling; Gustation Pathway; Gai Signaling; Gαs Signaling; Hepatic Cholestasis; IGF-1 Signaling; IL-1 Signaling; Insulin Receptor Signaling; Leptin Signaling in Obesity; Melanocyte Development and Pigmentation Signaling; Melatonin Signaling; Molecular Mechanisms of Cancer; Netrin Signaling; Neuropathic Pain Signaling In Dorsal Horn Neurons; Neuroprotective Role of THOP1 in Alzheimer's Disease; Nitric Oxide Signaling in the Cardiovascular System; Ovarian Cancer Signaling; P2Y Purigenic Receptor Signaling Pathway; Phototransduction Pathway; PPARα/RXRα Activation; Protein Kinase A Signaling; PXR/RXR Activation; RAR Activation; Relaxin Signaling; Renin-Angiotensin Signaling; Role of NFAT in Cardiac Hypertrophy; Sertoli Cell-Sertoli Cell Junction Signaling; Sonic Hedgehog Signaling; Sperm Motility; Synaptic Long Term Potentiation; Tight Junction Signaling; α-Adrenergic Signaling |
| Pre-mRNA-processing-splicing factor 8            | Prpf8   |       | Nucleus             | Y | other     | Systemic Lupus Erythematosus Signaling                                                                                                                                                                                                                                                                                                                                                                                                                                                                                                                                                                                                                                                                                                                                                                                                                                                                                  |
| Ribose-phosphate pyrophosphokinase 1             | Prps1   | 6     | Cytoplasm           |   | kinase    | PRPP Biosynthesis I                                                                                                                                                                                                                                                                                                                                                                                                                                                                                                                                                                                                                                                                                                                                                                                                                                                                                                     |
| Phosphoribosyl pyrophosphate synthetase 1-like 3 | Prps113 |       | Other               |   | kinase    | PRPP Biosynthesis I                                                                                                                                                                                                                                                                                                                                                                                                                                                                                                                                                                                                                                                                                                                                                                                                                                                                                                     |
| Protein PRRC2C                                   | Prrc2c  | 1,5,6 | Other               | Y | other     |                                                                                                                                                                                                                                                                                                                                                                                                                                                                                                                                                                                                                                                                                                                                                                                                                                                                                                                         |
| MCG124046                                        | Prss1   |       | Extracellular Space |   | peptidase | Role of Macrophages, Fibroblasts and Endothelial Cells in Rheumatoid Arthritis                                                                                                                                                                                                                                                                                                                                                                                                                                                                                                                                                                                                                                                                                                                                                                                                                                          |
| Phosphoserine aminotransferase                   | Psat1   |       | Cytoplasm           | Y | enzyme    | Serine Biosynthesis; Superpathway of Serine and Glycine Biosynthesis I                                                                                                                                                                                                                                                                                                                                                                                                                                                                                                                                                                                                                                                                                                                                                                                                                                                  |
| Proteasome subunit alpha type-2                  | Psm2    |       | Cytoplasm           | Y | peptidase | Protein Ubiquitination Pathway                                                                                                                                                                                                                                                                                                                                                                                                                                                                                                                                                                                                                                                                                                                                                                                                                                                                                          |
| Proteasome subunit alpha type-5                  | Psm5    | 6     | Cytoplasm           | Y | peptidase | Protein Ubiquitination Pathway                                                                                                                                                                                                                                                                                                                                                                                                                                                                                                                                                                                                                                                                                                                                                                                                                                                                                          |
| Proteasome subunit alpha type-7-like             | Psm8    |       | Nucleus             |   | peptidase | Huntington's Disease Signaling; Polyamine Regulation in Colon Cancer                                                                                                                                                                                                                                                                                                                                                                                                                                                                                                                                                                                                                                                                                                                                                                                                                                                    |
| Proteasome subunit beta type-1                   | Psm1    | 7     | Cytoplasm           | Y | peptidase | Protein Ubiquitination Pathway                                                                                                                                                                                                                                                                                                                                                                                                                                                                                                                                                                                                                                                                                                                                                                                                                                                                                          |
| Proteasome subunit beta type-10                  | Psm10   |       | Cytoplasm           |   | peptidase | Protein Ubiquitination Pathway                                                                                                                                                                                                                                                                                                                                                                                                                                                                                                                                                                                                                                                                                                                                                                                                                                                                                          |
| Proteasome subunit beta type-3                   | Psm3    |       | Cytoplasm           |   | peptidase | Protein Ubiquitination Pathway                                                                                                                                                                                                                                                                                                                                                                                                                                                                                                                                                                                                                                                                                                                                                                                                                                                                                          |
| Proteasome subunit beta type-4                   | Psm4    |       | Cytoplasm           | Y | peptidase | Protein Ubiquitination Pathway                                                                                                                                                                                                                                                                                                                                                                                                                                                                                                                                                                                                                                                                                                                                                                                                                                                                                          |
| 26S proteasome non-ATPase regulatory subunit 2   | Psm2    | 6     | Cytoplasm           | Y | other     | Protein Ubiquitination Pathway                                                                                                                                                                                                                                                                                                                                                                                                                                                                                                                                                                                                                                                                                                                                                                                                                                                                                          |



|                                                   |        |      |                 |   |             |                                                                                                                                                                                                                                                                                                                                                                                                                                                                                                                                                                                                                                                                                                                                                                                                                                                                                                                                                                                                                                                                                                                                                                                                                                                                                                                                                                                                                                                                                                                                                                                                                                                                                                                                                                                                                                                                                                                                                                                                        |
|---------------------------------------------------|--------|------|-----------------|---|-------------|--------------------------------------------------------------------------------------------------------------------------------------------------------------------------------------------------------------------------------------------------------------------------------------------------------------------------------------------------------------------------------------------------------------------------------------------------------------------------------------------------------------------------------------------------------------------------------------------------------------------------------------------------------------------------------------------------------------------------------------------------------------------------------------------------------------------------------------------------------------------------------------------------------------------------------------------------------------------------------------------------------------------------------------------------------------------------------------------------------------------------------------------------------------------------------------------------------------------------------------------------------------------------------------------------------------------------------------------------------------------------------------------------------------------------------------------------------------------------------------------------------------------------------------------------------------------------------------------------------------------------------------------------------------------------------------------------------------------------------------------------------------------------------------------------------------------------------------------------------------------------------------------------------------------------------------------------------------------------------------------------------|
| Proteasome activator complex subunit 1            | Psmc1  | 1,6  | Cytoplasm       |   | other       | Huntington's Disease Signaling; Polyamine Regulation in Colon Cancer; Protein Ubiquitination Pathway                                                                                                                                                                                                                                                                                                                                                                                                                                                                                                                                                                                                                                                                                                                                                                                                                                                                                                                                                                                                                                                                                                                                                                                                                                                                                                                                                                                                                                                                                                                                                                                                                                                                                                                                                                                                                                                                                                   |
| Serine/threonine-protein phosphatase 2A activator | Ptpa   |      | Cytoplasm       |   | phosphatase |                                                                                                                                                                                                                                                                                                                                                                                                                                                                                                                                                                                                                                                                                                                                                                                                                                                                                                                                                                                                                                                                                                                                                                                                                                                                                                                                                                                                                                                                                                                                                                                                                                                                                                                                                                                                                                                                                                                                                                                                        |
| Tyrosine-protein phosphatase non-receptor type 6  | Ptpn6  |      | Cytoplasm       | Y | phosphatase |                                                                                                                                                                                                                                                                                                                                                                                                                                                                                                                                                                                                                                                                                                                                                                                                                                                                                                                                                                                                                                                                                                                                                                                                                                                                                                                                                                                                                                                                                                                                                                                                                                                                                                                                                                                                                                                                                                                                                                                                        |
| Poly(U)-binding-splicing factor PUF60             | Puf60  | 1b,6 | Nucleus         | Y | other       |                                                                                                                                                                                                                                                                                                                                                                                                                                                                                                                                                                                                                                                                                                                                                                                                                                                                                                                                                                                                                                                                                                                                                                                                                                                                                                                                                                                                                                                                                                                                                                                                                                                                                                                                                                                                                                                                                                                                                                                                        |
| Pyrin and HIN domain-containing protein 1         | Pyhin1 |      |                 |   |             |                                                                                                                                                                                                                                                                                                                                                                                                                                                                                                                                                                                                                                                                                                                                                                                                                                                                                                                                                                                                                                                                                                                                                                                                                                                                                                                                                                                                                                                                                                                                                                                                                                                                                                                                                                                                                                                                                                                                                                                                        |
| Ras-related protein Rab-10                        | Rab10  |      | Cytoplasm       |   | enzyme      |                                                                                                                                                                                                                                                                                                                                                                                                                                                                                                                                                                                                                                                                                                                                                                                                                                                                                                                                                                                                                                                                                                                                                                                                                                                                                                                                                                                                                                                                                                                                                                                                                                                                                                                                                                                                                                                                                                                                                                                                        |
| Ras-related protein Rab-1A                        | Rab1a  |      | Cytoplasm       | Y | enzyme      |                                                                                                                                                                                                                                                                                                                                                                                                                                                                                                                                                                                                                                                                                                                                                                                                                                                                                                                                                                                                                                                                                                                                                                                                                                                                                                                                                                                                                                                                                                                                                                                                                                                                                                                                                                                                                                                                                                                                                                                                        |
| Ras-related protein Rab-1A                        | Rab1A  |      |                 | Y |             |                                                                                                                                                                                                                                                                                                                                                                                                                                                                                                                                                                                                                                                                                                                                                                                                                                                                                                                                                                                                                                                                                                                                                                                                                                                                                                                                                                                                                                                                                                                                                                                                                                                                                                                                                                                                                                                                                                                                                                                                        |
| Ras-related protein Rab-1B                        | Rab1b  |      | Cytoplasm       |   | other       |                                                                                                                                                                                                                                                                                                                                                                                                                                                                                                                                                                                                                                                                                                                                                                                                                                                                                                                                                                                                                                                                                                                                                                                                                                                                                                                                                                                                                                                                                                                                                                                                                                                                                                                                                                                                                                                                                                                                                                                                        |
| Ras-related protein Rab-2A                        | Rab2a  |      | Cytoplasm       |   | enzyme      |                                                                                                                                                                                                                                                                                                                                                                                                                                                                                                                                                                                                                                                                                                                                                                                                                                                                                                                                                                                                                                                                                                                                                                                                                                                                                                                                                                                                                                                                                                                                                                                                                                                                                                                                                                                                                                                                                                                                                                                                        |
| Ras-related C3 botulinum toxin substrate 1        | Rac1   |      | Plasma Membrane |   | enzyme      | Actin Cytoskeleton Signaling; Actin Nucleation by ARP-WASP Complex; Agrin Interactions at Neuromuscular Junction; Amyotrophic Lateral Sclerosis Signaling; Axonal Guidance Signaling; B Cell Receptor Signaling; Breast Cancer Regulation by Stathmin1; CCR3 Signaling in Eosinophils; CD28 Signaling in T Helper Cells; Clathrin-mediated Endocytosis Signaling; Colorectal Cancer Metastasis Signaling; CXCR4 Signaling; Ephrin A Signaling; Ephrin B Signaling; Ephrin Receptor Signaling; Epithelial Adherens Junction Signaling; ERK/MAPK Signaling; FAK Signaling; Fc Epsilon RI Signaling; Fcγ Receptor-mediated Phagocytosis in Macrophages and Monocytes; FGF Signaling; fMLP Signaling in Neutrophils; GDNF Family Ligand-Receptor Interactions; Germ Cell-Sertoli Cell Junction Signaling; Glioblastoma Multiforme Signaling; Glucocorticoid Receptor Signaling; GNRH Signaling; HGF Signaling; HMGB1 Signaling; iCOS-iCOSL Signaling in T Helper Cells; IL-3 Signaling; IL-8 Signaling; Integrin Signaling; Leukocyte Extravasation Signaling; LPS-stimulated MAPK Signaling; Macropinocytosis Signaling; Molecular Mechanisms of Cancer; mTOR Signaling; Natural Killer Cell Signaling; Netrin Signaling; NGF Signaling; PAK Signaling; Pancreatic Adenocarcinoma Signaling; Paxillin Signaling; PCP pathway; PEDF Signaling; Phospholipase C Signaling; PI3K Signaling in B Lymphocytes; PKCθ Signaling in T Lymphocytes; Production of Nitric Oxide and Reactive Oxygen Species in Macrophages; PTEN Signaling; Rac Signaling; RAR Activation; Regulation of Actin-based Motility by Rho; Regulation of IL-2 Expression in Activated and Anergic T Lymphocytes; Renal Cell Carcinoma Signaling; Renin-Angiotensin Signaling; RhoGDI Signaling; Role of Macrophages, Fibroblasts and Endothelial Cells in Rheumatoid Arthritis; Role of p14/p19ARF in Tumor Suppression; Role of Tissue Factor in Cancer; SAPK/JNK Signaling; Semaphorin Signaling in Neurons; Sertoli Cell-Sertoli Cell |

|                                            |        |      |           |   |        |                                                                                                                                                                                                                                                                                                                                                                                                                                                                                                                                                                                                                                                                                                                                                                                                                                                                                                                                                                                                                 |
|--------------------------------------------|--------|------|-----------|---|--------|-----------------------------------------------------------------------------------------------------------------------------------------------------------------------------------------------------------------------------------------------------------------------------------------------------------------------------------------------------------------------------------------------------------------------------------------------------------------------------------------------------------------------------------------------------------------------------------------------------------------------------------------------------------------------------------------------------------------------------------------------------------------------------------------------------------------------------------------------------------------------------------------------------------------------------------------------------------------------------------------------------------------|
|                                            |        |      |           |   |        | Junction Signaling; Signaling by Rho Family GTPases; Sphingosine-1-phosphate Signaling; STAT3 Pathway; T Cell Receptor Signaling; Tight Junction Signaling; Virus Entry via Endocytic Pathways                                                                                                                                                                                                                                                                                                                                                                                                                                                                                                                                                                                                                                                                                                                                                                                                                  |
| Receptor of activated protein C kinase 1   | Rack1  |      | Cytoplasm | Y | enzyme | Androgen Signaling; Antiproliferative Role of Somatostatin Receptor 2; Axonal Guidance Signaling; Breast Cancer Regulation by Stathmin1; Cardiac Hypertrophy Signaling; Cardiac $\beta$ -adrenergic Signaling; CCR3 Signaling in Eosinophils; CCR5 Signaling in Macrophages; Colorectal Cancer Metastasis Signaling; CREB Signaling in Neurons; CXCR4 Signaling; Ephrin B Signaling; Ephrin Receptor Signaling; fMLP Signaling in Neutrophils; G Beta Gamma Signaling; GM-CSF Signaling; G Protein Signaling Mediated by Tubby; G $\alpha$ i Signaling; G $\alpha$ q Signaling; G $\alpha$ s Signaling; Huntington's Disease Signaling; IL-1 Signaling; IL-8 Signaling; P2Y Purigenic Receptor Signaling Pathway; Phospholipase C Signaling; Protein Kinase A Signaling; Relaxin Signaling; RhoGDI Signaling; Role of NFAT in Cardiac Hypertrophy; Role of NFAT in Regulation of the Immune Response; Signaling by Rho Family GTPases; Tec Kinase Signaling; Thrombin Signaling; $\alpha$ -Adrenergic Signaling |
| UV excision repair protein RAD23 homolog B | Rad23b | 6    | Nucleus   | Y | other  | Nucleotide Excision Repair Pathway                                                                                                                                                                                                                                                                                                                                                                                                                                                                                                                                                                                                                                                                                                                                                                                                                                                                                                                                                                              |
| GTP-binding nuclear protein Ran            | Ran    | 2,6  | Nucleus   | Y | enzyme | RAN Signaling; Sumoylation Pathway                                                                                                                                                                                                                                                                                                                                                                                                                                                                                                                                                                                                                                                                                                                                                                                                                                                                                                                                                                              |
| Ras-related protein Rap-1A                 | Rap1a  | 6    | Cytoplasm |   | enzyme | Axonal Guidance Signaling; B Cell Receptor Signaling; Calcium Signaling; cAMP-mediated signaling; Corticotropin Releasing Hormone Signaling; Ephrin Receptor Signaling; Epithelial Adherens Junction Signaling; ERK/MAPK Signaling; G-Protein Coupled Receptor Signaling; G $\alpha$ i Signaling; G $\alpha$ s Signaling; HGF Signaling; Integrin Signaling; Leukocyte Extravasation Signaling; Molecular Mechanisms of Cancer; NGF Signaling; Phospholipase C Signaling; Production of Nitric Oxide and Reactive Oxygen Species in Macrophages; Protein Kinase A Signaling; Relaxin Signaling; Renal Cell Carcinoma Signaling; Synaptic Long Term Potentiation                                                                                                                                                                                                                                                                                                                                                 |
| Ras-related protein Rap-1b                 | Rap1b  |      | Cytoplasm | Y | enzyme | Antiproliferative Role of Somatostatin Receptor 2; Axonal Guidance Signaling; B Cell Receptor Signaling; Calcium Signaling; Corticotropin Releasing Hormone Signaling; Ephrin Receptor Signaling; Epithelial Adherens Junction Signaling; ERK/MAPK Signaling; HGF Signaling; Integrin Signaling; Leukocyte Extravasation Signaling; Molecular Mechanisms of Cancer; NGF Signaling; Phospholipase C Signaling; Production of Nitric Oxide and Reactive Oxygen Species in Macrophages; Protein Kinase A Signaling; Relaxin Signaling; Synaptic Long Term Potentiation                                                                                                                                                                                                                                                                                                                                                                                                                                             |
| Arginine--tRNA ligase, cytoplasmic         | Rars   | 6    | Cytoplasm |   | enzyme | tRNA Charging                                                                                                                                                                                                                                                                                                                                                                                                                                                                                                                                                                                                                                                                                                                                                                                                                                                                                                                                                                                                   |
| Protein RCC2                               | Rcc2   | 1b,6 | Nucleus   | Y | other  |                                                                                                                                                                                                                                                                                                                                                                                                                                                                                                                                                                                                                                                                                                                                                                                                                                                                                                                                                                                                                 |
| Transforming protein RhoA                  | Rhoa   |      | Cytoplasm | Y | enzyme | Actin Cytoskeleton Signaling; Actin Nucleation by ARP-WASP Complex; Axonal Guidance Signaling; Breast Cancer Regulation by Stathmin1; Cardiac Hypertrophy Signaling; CCR3 Signaling in Eosinophils; Chemokine Signaling; Cholecystokinin/Gastrin-mediated Signaling; Colorectal Cancer Metastasis Signaling; CXCR4 Signaling; Ephrin A Signaling; Ephrin B Signaling; Ephrin Receptor Signaling; Epithelial Adherens Junction Signaling; Germ Cell-Sertoli Cell Junction Signaling; Glioblastoma Multiforme Signaling; Glioma Invasiveness Signaling; G $\alpha$ 12/13 Signaling; G $\alpha$ q Signaling; HMGB1 Signaling; IL-8 Signaling; ILK Signaling; Integrin Signaling; Leukocyte Extravasation                                                                                                                                                                                                                                                                                                           |

|                                                                          |        |    |           |   |        |                                                                                                                                                                                                                                                                                                                                                                                                                                                                                                                                                                                                                                                                                                                             |
|--------------------------------------------------------------------------|--------|----|-----------|---|--------|-----------------------------------------------------------------------------------------------------------------------------------------------------------------------------------------------------------------------------------------------------------------------------------------------------------------------------------------------------------------------------------------------------------------------------------------------------------------------------------------------------------------------------------------------------------------------------------------------------------------------------------------------------------------------------------------------------------------------------|
|                                                                          |        |    |           |   |        | Signaling; Macropinocytosis Signaling; Molecular Mechanisms of Cancer; mTOR Signaling; NGF Signaling; PCP pathway; PEDF Signaling; Phagosome Formation; Phospholipase C Signaling; Production of Nitric Oxide and Reactive Oxygen Species in Macrophages; Protein Kinase A Signaling; Rac Signaling; Regulation of Actin-based Motility by Rho; Regulation of the Epithelial-Mesenchymal Transition Pathway; RhoA Signaling; RhoGDI Signaling; Role of Macrophages, Fibroblasts and Endothelial Cells in Rheumatoid Arthritis; Semaphorin Signaling in Neurons; Signaling by Rho Family GTPases; Sphingosine-1-phosphate Signaling; Sumoylation Pathway; Tec Kinase Signaling; Thrombin Signaling; Tight Junction Signaling |
| 60S ribosomal protein L10                                                | Rpl10  | 1b | Cytoplasm |   | other  | EIF2 Signaling                                                                                                                                                                                                                                                                                                                                                                                                                                                                                                                                                                                                                                                                                                              |
| 60S ribosomal protein L13                                                | Rpl13  |    | Nucleus   | Y | other  | EIF2 Signaling                                                                                                                                                                                                                                                                                                                                                                                                                                                                                                                                                                                                                                                                                                              |
| 60S ribosomal protein L14                                                | Rpl14  |    | Cytoplasm | Y | other  | EIF2 Signaling                                                                                                                                                                                                                                                                                                                                                                                                                                                                                                                                                                                                                                                                                                              |
| 60S ribosomal protein L17                                                | Rpl17  |    | Cytoplasm |   | other  | EIF2 Signaling                                                                                                                                                                                                                                                                                                                                                                                                                                                                                                                                                                                                                                                                                                              |
| 60S ribosomal protein L18                                                | Rpl18  |    | Cytoplasm | Y | other  | EIF2 Signaling                                                                                                                                                                                                                                                                                                                                                                                                                                                                                                                                                                                                                                                                                                              |
| 60S ribosomal protein L19                                                | Rpl19  | 6  | Cytoplasm | Y | other  | EIF2 Signaling                                                                                                                                                                                                                                                                                                                                                                                                                                                                                                                                                                                                                                                                                                              |
| 60S ribosomal protein L21                                                | Rpl21  | 6  | Cytoplasm |   | other  | EIF2 Signaling                                                                                                                                                                                                                                                                                                                                                                                                                                                                                                                                                                                                                                                                                                              |
| 60S ribosomal protein L27                                                | Rpl27  |    | Cytoplasm |   | other  | EIF2 Signaling                                                                                                                                                                                                                                                                                                                                                                                                                                                                                                                                                                                                                                                                                                              |
| 60S ribosomal protein L27a                                               | Rpl27a | 6  | Cytoplasm | Y | other  | EIF2 Signaling                                                                                                                                                                                                                                                                                                                                                                                                                                                                                                                                                                                                                                                                                                              |
| 60S ribosomal protein L34                                                | Rpl34  |    | Cytoplasm | Y | other  | EIF2 Signaling                                                                                                                                                                                                                                                                                                                                                                                                                                                                                                                                                                                                                                                                                                              |
| 60S ribosomal protein L35a                                               | Rpl35a |    | Cytoplasm |   | other  | EIF2 Signaling                                                                                                                                                                                                                                                                                                                                                                                                                                                                                                                                                                                                                                                                                                              |
| 60S ribosomal protein L37a                                               | Rpl37a |    | Cytoplasm |   | other  | EIF2 Signaling                                                                                                                                                                                                                                                                                                                                                                                                                                                                                                                                                                                                                                                                                                              |
| 60S ribosomal protein L4                                                 | Rpl4   | 6  | Cytoplasm | Y | enzyme | EIF2 Signaling                                                                                                                                                                                                                                                                                                                                                                                                                                                                                                                                                                                                                                                                                                              |
| 60S ribosomal protein L8                                                 | Rpl8   | 1  | Cytoplasm |   | other  | EIF2 Signaling                                                                                                                                                                                                                                                                                                                                                                                                                                                                                                                                                                                                                                                                                                              |
| Dolichyl-diphosphooligosaccharide--protein glycosyltransferase subunit 2 | Rpn2   |    | Cytoplasm |   | enzyme |                                                                                                                                                                                                                                                                                                                                                                                                                                                                                                                                                                                                                                                                                                                             |

|                                                       |          |      |           |   |                         |                                                                         |
|-------------------------------------------------------|----------|------|-----------|---|-------------------------|-------------------------------------------------------------------------|
| 40S ribosomal protein S11                             | Rps11    |      | Cytoplasm | Y | other                   | EIF2 Signaling; mTOR Signaling; Regulation of eIF4 and p70S6K Signaling |
| 40S ribosomal protein S13                             | Rps13    |      | Cytoplasm | Y | other                   | EIF2 Signaling; mTOR Signaling; Regulation of eIF4 and p70S6K Signaling |
| 40S ribosomal protein S14                             | Rps14    |      | Cytoplasm | Y | translation regulator   |                                                                         |
| 40S ribosomal protein S26                             | Rps26    |      | Cytoplasm | Y | other                   | EIF2 Signaling; mTOR Signaling; Regulation of eIF4 and p70S6K Signaling |
| Ubiquitin-40S ribosomal protein S27a                  | Rps27a   | 6    | Cytoplasm | Y | other                   | EIF2 Signaling; mTOR Signaling; Regulation of eIF4 and p70S6K Signaling |
| 40S ribosomal protein S3                              | Rps3     | 6    | Cytoplasm | Y | enzyme                  | EIF2 Signaling; mTOR Signaling; Regulation of eIF4 and p70S6K Signaling |
| 40S ribosomal protein S7                              | Rps7     |      | Cytoplasm |   | other                   | EIF2 Signaling; mTOR Signaling; Regulation of eIF4 and p70S6K Signaling |
| 40S ribosomal protein S8                              | Rps8     |      | Cytoplasm | Y | other                   | EIF2 Signaling; mTOR Signaling; Regulation of eIF4 and p70S6K Signaling |
| 40S ribosomal protein S9                              | Rps9     |      | Cytoplasm | Y | translation regulator   |                                                                         |
| RuvB-like 2                                           | Ruvbl2   | 6    | Nucleus   | Y | transcription regulator |                                                                         |
| SUMO-activating enzyme subunit 1                      | Sae1     | 6    | Cytoplasm | Y | enzyme                  | Sumoylation Pathway                                                     |
| Serologically defined colon cancer antigen 3 homolog  | Sdccag3  | 6    | Cytoplasm | Y | other                   |                                                                         |
| MKIAA0079 protein                                     | Sec24c   | 1    | Cytoplasm | Y | transporter             |                                                                         |
| Protein transport protein Sec31A                      | Sec31a   | 1,6  | Cytoplasm | Y | other                   |                                                                         |
| Septin-1                                              | Sept1    |      | Cytoplasm | Y | other                   |                                                                         |
| Septin-7                                              | Sept7    |      | Cytoplasm | Y | other                   | RhoA Signaling; Signaling by Rho Family GTPases                         |
| Plasminogen activator inhibitor 1 RNA-binding protein | Serbp1   | 6    | Cytoplasm | Y | other                   | Sumoylation Pathway                                                     |
| Splicing factor 3B subunit 3                          | Sf3b3    | 6    | Nucleus   | Y | other                   | Spliceosomal Cycle                                                      |
| Calcium-binding mitochondrial carrier protein Aralar1 | Slc25a12 |      | Cytoplasm |   | transporter             |                                                                         |
| ADP/ATP translocase 2                                 | Slc25a5  | 1b,5 | Cytopla   |   | transporter             |                                                                         |

|                                                                                  |         |      |                 |   |                         |                                                                                                                                                                                                                                                                                            |
|----------------------------------------------------------------------------------|---------|------|-----------------|---|-------------------------|--------------------------------------------------------------------------------------------------------------------------------------------------------------------------------------------------------------------------------------------------------------------------------------------|
|                                                                                  |         |      | sm              |   |                         |                                                                                                                                                                                                                                                                                            |
| Structural maintenance of chromosomes flexible hinge domain-containing protein 1 | Smchd1  | 1b,6 | Nucleus         | Y | other                   |                                                                                                                                                                                                                                                                                            |
| Staphylococcal nuclease domain-containing protein 1                              | Snd1    | 6    | Nucleus         | Y | enzyme                  |                                                                                                                                                                                                                                                                                            |
| Spectrin alpha chain, non-erythrocytic 1                                         | Sptan1  | 6    | Plasma Membrane | Y | other                   | Apoptosis Signaling; Death Receptor Signaling; Sertoli Cell-Sertoli Cell Junction Signaling; Tight Junction Signaling                                                                                                                                                                      |
| Tyrosine-protein kinase Srms                                                     | Srm     |      | Cytoplasm       | Y | enzyme                  | Spermidine Biosynthesis I                                                                                                                                                                                                                                                                  |
| Serine/arginine-rich splicing factor 3                                           | Srsf3   | 6    | Nucleus         | Y | other                   |                                                                                                                                                                                                                                                                                            |
| SOSS complex subunit B2                                                          | Ssb     | 1b,6 | Nucleus         |   | enzyme                  |                                                                                                                                                                                                                                                                                            |
| Succinate--CoA ligase [ADP/GDP-forming] subunit alpha, mitochondrial             | Suclg1  | 6    | Cytoplasm       |   | enzyme                  | TCA Cycle II (Eukaryotic)                                                                                                                                                                                                                                                                  |
| Suppressor of Ty16                                                               | Supt16  |      | Nucleus         |   | transcription regulator |                                                                                                                                                                                                                                                                                            |
| FACT complex subunit SPT16                                                       | Supt16h | 6    |                 | Y |                         |                                                                                                                                                                                                                                                                                            |
| Heterogeneous nuclear ribonucleoprotein Q                                        | Syncrip | 6    | Nucleus         | Y | other                   |                                                                                                                                                                                                                                                                                            |
| Transgelin-2                                                                     | Tagln2  | 6    | Cytoplasm       | Y | other                   |                                                                                                                                                                                                                                                                                            |
| Transaldolase                                                                    | Taldo1  | 6    | Cytoplasm       | Y | enzyme                  | Pentose Phosphate Pathway; Pentose Phosphate Pathway (Non-oxidative Branch)                                                                                                                                                                                                                |
| T-complex protein 1 subunit alpha                                                | Tcp1    | 6    | Cytoplasm       | Y | other                   |                                                                                                                                                                                                                                                                                            |
| THO complex subunit 3                                                            | Thoc3   | 6    | Nucleus         |   | other                   |                                                                                                                                                                                                                                                                                            |
| Transketolase                                                                    | Tkt     | 6    | Cytoplasm       | Y | enzyme                  | Pentose Phosphate Pathway; Pentose Phosphate Pathway (Non-oxidative Branch)                                                                                                                                                                                                                |
| Talin-1                                                                          | Tln1    | 6    | Plasma Membrane | Y | other                   | Actin Cytoskeleton Signaling; Crosstalk between Dendritic Cells and Natural Killer Cells; ERK/MAPK Signaling; FAK Signaling; Fcγ Receptor-mediated Phagocytosis in Macrophages and Monocytes; Integrin Signaling; Paxillin Signaling; Regulation of Cellular Mechanics by Calpain Protease |
| DNA topoisomerase 2-alpha                                                        | Top2a   |      | Nucleus         | Y | enzyme                  | Cell Cycle: G2/M DNA Damage Checkpoint Regulation; Cell Cycle Control of Chromosomal Replication                                                                                                                                                                                           |
| Triosephosphate isomerase                                                        | Tpi1    | 6    | Cytopla         | Y | enzyme                  | Glycolysis I; Sucrose Degradation V (Mammalian)                                                                                                                                                                                                                                            |

|                                                |          |         |                     |   |        |                                                                                                                                                                                                                                                                                                                         |
|------------------------------------------------|----------|---------|---------------------|---|--------|-------------------------------------------------------------------------------------------------------------------------------------------------------------------------------------------------------------------------------------------------------------------------------------------------------------------------|
|                                                |          |         | sm                  |   |        |                                                                                                                                                                                                                                                                                                                         |
| Tropomyosin alpha-3 chain                      | Tpm3     |         | Cytoplasm           | Y | other  | Calcium Signaling                                                                                                                                                                                                                                                                                                       |
| Uncharacterized protein                        | Tpm3-rs7 |         | Other               |   | other  |                                                                                                                                                                                                                                                                                                                         |
| Transformer-2 protein homolog beta             | Tra2b    | 6       | Nucleus             | Y | other  |                                                                                                                                                                                                                                                                                                                         |
| Tripartite motif-containing protein 44         | Trim44   |         | Cytoplasm           | Y | other  |                                                                                                                                                                                                                                                                                                                         |
| Tubulin alpha-1B chain                         | Tuba1b   |         | Cytoplasm           | Y | other  | 14-3-3-mediated Signaling; Axonal Guidance Signaling; Breast Cancer Regulation by Stathmin1; Epithelial Adherens Junction Signaling; Gap Junction Signaling; Germ Cell-Sertoli Cell Junction Signaling; Phagosome Maturation; Remodeling of Epithelial Adherens Junctions; Sertoli Cell-Sertoli Cell Junction Signaling |
| Tubulin beta-4B chain                          | Tubb4b   |         | Cytoplasm           | Y | other  | 14-3-3-mediated Signaling; Axonal Guidance Signaling; Breast Cancer Regulation by Stathmin1; Epithelial Adherens Junction Signaling; Gap Junction Signaling; Germ Cell-Sertoli Cell Junction Signaling; Phagosome Maturation; Remodeling of Epithelial Adherens Junctions; Sertoli Cell-Sertoli Cell Junction Signaling |
| Tubulin beta-5 chain                           | Tubb5    |         | Cytoplasm           | Y | other  | 14-3-3-mediated Signaling; Axonal Guidance Signaling; Breast Cancer Regulation by Stathmin1; Epithelial Adherens Junction Signaling; Gap Junction Signaling; Germ Cell-Sertoli Cell Junction Signaling; Phagosome Maturation; Remodeling of Epithelial Adherens Junctions; Sertoli Cell-Sertoli Cell Junction Signaling |
| Twinfilin-2                                    | Twf2     |         | Cytoplasm           | Y | kinase |                                                                                                                                                                                                                                                                                                                         |
| Thioredoxin                                    | Txn      | 6       |                     |   |        |                                                                                                                                                                                                                                                                                                                         |
| Splicing factor U2AF 65 kDa subunit            | U2af2    | 6       | Nucleus             | Y | other  |                                                                                                                                                                                                                                                                                                                         |
| Ubiquitin-like modifier-activating enzyme 1    | Uba1     | 6       | Cytoplasm           | Y | enzyme | Protein Ubiquitination Pathway                                                                                                                                                                                                                                                                                          |
| Ubiquitin-associated protein 2-like            | Uba2     | 1,4,5,6 | Nucleus             | Y | other  |                                                                                                                                                                                                                                                                                                                         |
| UDP-glucose:glycoprotein glucosyltransferase 1 | Uggt1    |         | Cytoplasm           | Y | enzyme |                                                                                                                                                                                                                                                                                                                         |
| Versican core protein                          | Vcan     |         | Extracellular Space | Y | other  |                                                                                                                                                                                                                                                                                                                         |
| Transitional endoplasmic reticulum ATPase      | Vcp      | 6       | Cytoplasm           | Y | enzyme | NRF2-mediated Oxidative Stress Response; Unfolded protein response                                                                                                                                                                                                                                                      |

|                                                     |        |       |                     |   |             |                                                                                                                                                                                                                                                        |
|-----------------------------------------------------|--------|-------|---------------------|---|-------------|--------------------------------------------------------------------------------------------------------------------------------------------------------------------------------------------------------------------------------------------------------|
| Voltage-dependent anion-selective channel protein 3 | Vdac3  | 1,5,6 | Cytoplasm           | Y | ion channel | Mitochondrial Dysfunction                                                                                                                                                                                                                              |
| WD repeat-containing protein 1                      | Wdr1   |       | Extracellular Space | Y | other       |                                                                                                                                                                                                                                                        |
| Exportin-4                                          | Xpo4   |       | Nucleus             | Y | transporter |                                                                                                                                                                                                                                                        |
| 14-3-3 protein zeta/delta                           | Ywhaz  | 6     | Cytoplasm           | Y | enzyme      | 14-3-3-mediated Signaling; Cell Cycle: G2/M DNA Damage Checkpoint Regulation; ERK/MAPK Signaling; ERK5 Signaling; HIPPO signaling; IGF-1 Signaling; Myc Mediated Apoptosis Signaling; p70S6K Signaling; PI3K/AKT Signaling; Protein Kinase A Signaling |
| Zinc finger MIZ domain-containing protein 1         | Zmiz1  |       | Nucleus             |   | other       |                                                                                                                                                                                                                                                        |
| E3 ubiquitin-protein ligase Zswim2                  | Zswim2 |       | Other               |   | enzyme      |                                                                                                                                                                                                                                                        |

## Figures

**S1. Flow cytometry analysis of *in vitro* differentiated T cells.** - Representative dot plot of flow cytometry results showing MFI for CD62L (AlexaFluor 700) vs CD44 (FITC) staining of Naive (total splenocytes), IL-2-treated effector CD8 T cells and IL-15/7-treated memory CD8 T cells.

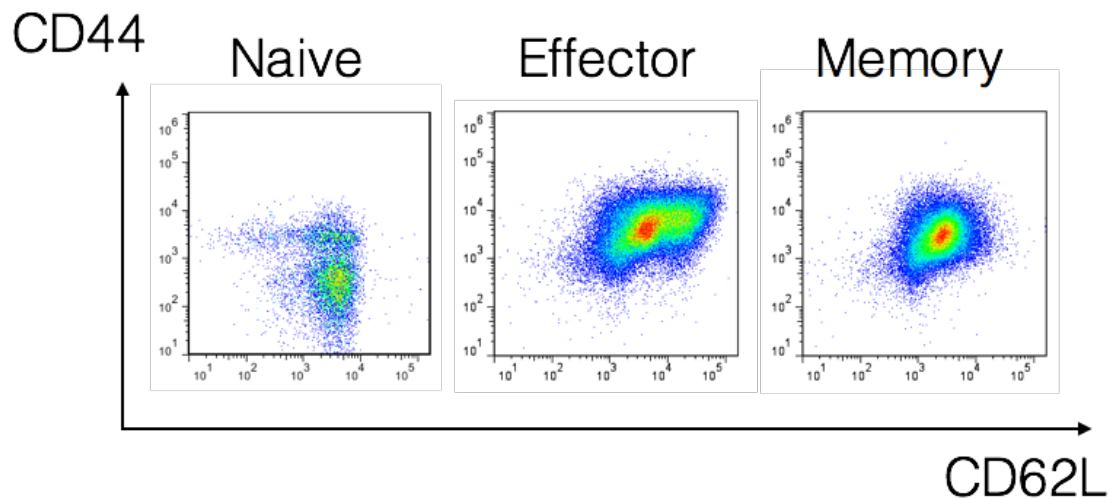

**S2. Comparison between UDP-GalNAz and UDP-GalNAI donors for in solution protein labeling** – Western Blot of  $\alpha$ -crystallin treated with GalT1 and azide or alkyne-containing UDP donors, followed by reacting with either biotin-accelerated azide or biotin-alkyne via CuAAC.<sup>1</sup>

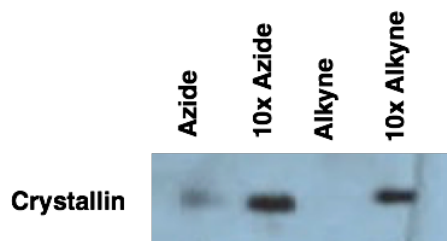



**S3. Correlation matrix of all confident proteins.** Red to black gradient showing high to low correlation between each protein pair. Data was clustered by K-mean algorithm using  $p=15$ . Approximately 7 strongly correlated clusters were found.

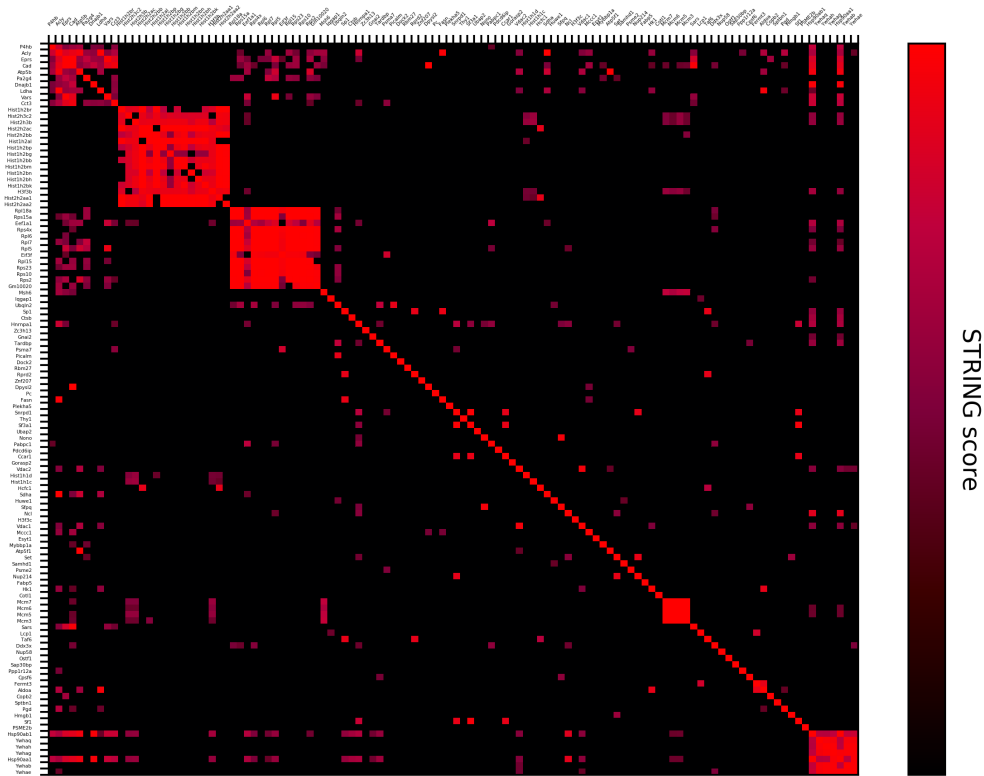

## Materials and Methods

### 1. General Methods and Materials

All reagents and solvents were acquired from Fisher Scientific unless otherwise stated. PBS and RPMI Media were acquired from Gibco, fluorescently labelled antibodies were obtained from Biolegend, and cytokines were purchased from Gemini. Electrophoresis and Western Blotting were done using BioRad equipment. Primary antibodies were obtained from various sources: O-GlcNAc antibody from Biolegend, GAPDH antibody from R&D Systems, and PARP antibody from TACS. Flow cytometry analysis was performed in an Attune Attune™ NxT Acoustic Focusing Cytometer. FACS data analysis was completed using Flowjo analysis software. Photomicrographs were acquired on a BZ-X700 Keyence Microscope and all images processed using ImageJ software. Statistical analysis and graph generation was completed using GraphPad Prism software.

### 2. Mice

All animal studies were carried out under a protocol approved by the Institutional Animal Care And Use Committee at The Scripps Research Institute (TSRI). C57BL/6 mice were used for all *in vivo* differentiation studies and OT-1+/- Rag +/- were used for *in vitro* differentiation experiments at 6 to 10 weeks of age. Mice were bred and housed in the vivarium of The Scripps Research Institute.

### 3. Bacterial infection

*Listeria monocytogenes* (LM) was grown in Brain Heart Infusion (BHI) Broth from a stock inoculum on day of infection. Bacteria were cultured at 37°C until OD<sub>600</sub>=0.08-0.2, and then diluted for infection in PBS. 10,000 LM were introduced to C57BL/6 mice via Intraperitoneal Injection.

### 4. T cell isolation and *in vitro* differentiation

Naive mice or mice at peak of infection (7 dpi) were euthanized and the spleen collected. Spleen pieces were suspended in 2 mL culture media (RPMI, 10% FCS, 10 mM HEPES, 1 mM Sodium pyruvate, P/S, 100x non-essential amino acids (Gibco), and 55 μM mercaptoethanol) and passed through a 75 μm strainer. 2 mL of 2x Red Blood Cell lysis buffer was added and cells were incubated at room temperature for 15 min. The cell suspension was centrifuged (5 min-300 x g) and the pellet was suspended in PBS and centrifuged again (5 min-300 x g). Cells were then suspended in culture media and 1 nM of SIINFEKL peptide was added. Cells were grown at 37°C for 3 days after which cells were collected and enriched for CD8+ T cells as follows. Cells were collected by centrifugation (5 min-300 x g), washed with PBS and counted. Cells were diluted to 100 M/mL in PBS containing a cocktail of depletion antibodies prepared in house (5 μg each of PK135 for NK1.1, GK1.5 for CD4, M1/70 for CD11b, RA3-6B2 for B220, MS114 for MHCII, Ter119 (Biolegend) for RBC) and incubated with rotation at 4°C for 1 hr. Cells were collected by centrifugation (5 min-300 x g) and washed once with PBS. Pelleted cells were then diluted to 100 M/mL in PBS containing pre-washed Sheep anti-Rat IgG-Dynabeads (Invitrogen) in a 1 bead/cell concentration and incubated with rotation at 4°C for 1 hr. Dynabeads were then removed by magnetic-based separation and cells were then concentrated by centrifugation (5 min-300 x g). Pelleted cells were suspended in culture media and split in half. IL-2 (10 ng/mL), or IL-15 (20 ng/mL) and IL-7 (10 ng/mL) were added to the media, and cells were then grown for 4 days at 37°C.

### 5. Flow Cytometry

Cells were washed with PBS and then stained with CD62L-AlexaFluor 700 and CD44-FITC antibodies (1:200 μL in PBS) for 30 min at 4°C. Cells were centrifuged (400 x g for 4 min) and washed with PBS. Cells were suspended in PBS with DAPI and analysed by flow cytometry directly.

### 6. Cell lysis and subcellular fractionation

Cells were lysed with ThermoFisher's Subcellular Protein Fractionation Kit for Cultured Cells according to manufacturer's protocol. In short, 200  $\mu$ L ice cold CEB buffer with protease inhibitors was added to a 20  $\mu$ L cell pellet and incubated at 4°C for 10 min. Suspension was centrifuged at 500 x g for 5 min. The supernatant was used as the cytoplasmic fraction and 200  $\mu$ L of ice cold MEB buffer with protease inhibitors was added to the pellet. The suspension was vortexed for 5 sec and then incubated at 4°C for 10 min, followed by centrifugation at 3000 x g for 5 mins. The supernatant was used as the membrane fraction and 100  $\mu$ L of ice cold NEB buffer with protease inhibitors was added to the pellet. The suspension was vortexed for 15 sec and then incubated at 4°C for 30 min. The suspension was finally centrifuged at 5000 x g for 5 mins and the supernatant used as the nuclear fraction. No further fractionation was done to the pellet.

### *7. Immunoblotting*

Cell lysates were run in 4-12% Bis-Tris gels (Novex) using MES running buffer for 1.5 hrs at 100 V. Gels were then transferred using Novex Blotting buffer onto Nitrocellulose membranes at 300 mA for 2hrs. Membranes were blocked for 1 hr at room temperature using 5% powdered non-fat milk in TBST, and subsequently incubated overnight with primary antibodies (1:100 in 5% milk-TBST) at 4°C with shaking. Membranes were washed 3 x 5 min with TBST at room temperature with shaking and then incubated with HRP-labelled antibody (1:3000 in 5% milk-TBST) for 1 hr under the same conditions. Membranes were then washed 3 x 5 min with TBST and SuperSignal West Pico Chemiluminescent Substrate (ThermoFisher) for 3 min and subjected to X-ray exposure.

### *8. Histology and O-GlcNAc CHoMP*

Mice were euthanized and the spleen was harvested and immediately immersed in Zinc Formalin fixative for 24 hrs. Tissues were paraffin embedded by TSRI's Histology Core Facility, and then sectioned on a microtome at 5  $\mu$ m. Sections were deparaffinised and rehydrated according to standard protocols. In summary, the slides were sequentially immersed in coplin jars for 5 min in 40 mL: 2x Histo-Clear II (National Diagnostics), 2x Ethanol, 2x 70% Ethanol, 2x 50% Ethanol and d.H<sub>2</sub>O. A hydrophobic barrier was drawn around the tissue samples on the slides using a PAP pen. Tissues were immersed in 50 mL of TBS + 0.1% Tween-20 (TBST) for 10 minutes. Slides were then placed in a humidified chamber and 100  $\mu$ L of PNGaseF NEB standard reaction solution was added (1x G1 buffer, 1% NP-40, and 2  $\mu$ L PNGaseF). Slides were incubated overnight at 37°C, followed by TBST wash in coplin jars (3 x 5 min). Slides were then placed again in a humidified chamber and 100  $\mu$ L of enzyme solution was added. The enzyme solution contained: 25  $\mu$ g/mL of GalT1, 500  $\mu$ M UDP-Gal-alkyne, 1 mM MnCl<sub>2</sub>, 50 mM NaCl, 20 mM HEPES, 2% NP-40, pH7.9). The slides were incubated for 3 hr at 4°C. The slides were then washed with TBST in coplin jars (3 x 5 min). The slides were again placed in a humidified chamber and blocked with avidin/biotin according to standard procedures. In short, 1 drop of avidin solution (Biolegend kit) was added to the tissue and the slides were incubated at room temperature for 10 min, followed by TBST wash (3 x 3 min each). 1 drop of biotin solution was then added to the tissue and the slides were incubated at room temperature for 10 mins, followed by TBST wash (3 x 3 min each). The slides were then placed again in a humidified chamber and 'clicked' to a biotin probe with a solution containing: (50  $\mu$ M accelerated azide-biotin probe<sup>8</sup>, 75  $\mu$ M CuSO<sub>4</sub>, 150  $\mu$ M BTTP ligand, 2.5 mM sodium ascorbate) in TBST for 1 hr at RT. Following three washes in TBST (5 min each), the tissues were blocked for 10 min in 0.3% hydrogen peroxide diluted in TBS in coplin jars at RT, and washed with TBST (3 x 5 min) to remove the H<sub>2</sub>O<sub>2</sub>. The slides were then placed in a humidified chamber and incubated with Neutravidin-HRP (1:100 in TBST) for 1h at RT, then subsequently washed with TBST (3 x 5 min) in coplin jars. The slides were placed in a humidified chamber and incubated with TSA-Plus FITC reagent according to manufacturers protocol (1:50 dilution for 5 min at RT, protected from light), then washed with TBST (3 x 5 min) in coplin jars. Slides were then subjected to antigen retrieval with Vector unmasking solution in a coplin jar heated to 95°C

for 30 min. The coplin jar was removed from heat and allowed to cool at RT for 30 min. Slides then placed in a humidified chamber and incubated with APC-B220 antibody diluted 1:100 TBST with 1% FCS for 1h at RT. Slides were washed with TBST (3 x 5 min) in a coplin jar and mounted with Prolong anti-fade gold with Dapi (Invitrogen).

## 9. Reagent preparation for chemoenzymatic reactions

### 9.1. GalT1

Bacteria were grown at 37°C in LB media (2 L) containing 100 µg/ml ampicillin until OD<sub>600</sub> 0.7. IPTG (1 mM) was then added and the culture was grown for another 4 hrs, and the cells were harvested by centrifugation at 2000 x g for 15 min. The bacterial pellet was suspended in 10 ml PBS and sonicated thoroughly to lyse the cells. The suspension was diluted to 80 ml with PBS and centrifuged at 14,000 x g for 30 min. The inclusion body pellet was washed four times with 25% (w/v) sucrose in PBS, and a final time with PBS alone. Inclusion bodies were dissolved in 10 ml of 5 M guanidine hydrochloride (Gu-HCl) with 0.3 M sodium sulfite at RT. To sulfonate all the free thiols in the protein molecule, 1 ml of 50 mM S-sulfonating agent, 2-nitro- 5-(sulfothio)-benzoate (NTSB)<sup>9</sup>, was added to this solution and stirred vigorously. Completion of sulfonation was judged by the color change of the solution from red to pale yellow. The protein solution was then diluted 10 fold with water in order to precipitate the sulfonated protein. The protein precipitate was collected by centrifugation at 10,000 x g and washed three times by re-suspending in water, followed by centrifugation to remove any remaining sulfonating agent. The sulfonated protein was re-dissolved in 5 M Gu-HCl to a protein concentration of 1 mg/ml which has an absorption of 1.9 to 2.0 OD at 275 nm. The protein solution was diluted ten fold in multiple portions, in a folding solution to give a final concentration of 100 µg/ml protein, 0.5 M GuHCl, 50 mM Tris-HCl, 5 mM EDTA, 4 mM cysteamine and 2 mM cystamine, pH 8.0 at 4°C. The protein was allowed to fold for 48 hrs at 4°C, then dialyzed against 3 times in 4 liters of water containing 50 mM Tris-HCl, pH 8.0, 4 mM cysteamine and 2 mM cystamine at 4°C to remove GuHCl. The protein which precipitated during dialysis was removed by centrifugation and the supernatant was concentrated to obtain working GalT1 which was used without further purification.

### 9.2 UDP-GalNAI

A reaction mixture (5 mL) containing 10 mM GalNAL, 20 mM ATP, 20 mM UTP, 20 mM MgCl<sub>2</sub>, 0.5 mg/mL Agx1<sup>10</sup>, and 0.1 mg/mL NahK<sup>11</sup> in 100 mM Tris-HCl pH 8.5 was shaken at 36°C and the progress of the reaction was monitored by TLC (6:3:3:1 Ethyl Acetate/MeOH/H<sub>2</sub>O/Acetic acid). After overnight incubation, 5 mL ice cold EtOH was added to precipitate the protein. The precipitate was removed by centrifugation and the supernatant was concentrated by rotary evaporation to 1 mL. The crude solution was applied to a Bio-Gel P-2 column, using 50 mM ABC as eluent. The fractions containing product were collected, lyophilized and used without further purification.

### 9.2 UDP-GalNAz

A reaction mixture (5 mL) containing 10 mM GalNAz, 20 mM ATP, 20 mM UTP, 20 mM MgCl<sub>2</sub>, 0.5 mg/mL Agx1<sup>10</sup>, and 0.1 mg/mL NahK<sup>11</sup> in 100 mM Tris-HCl pH 8.5 was shaken at 36°C and the progress of the reaction was monitored by TLC (6:3:3:1 Ethyl Acetate/MeOH/H<sub>2</sub>O/Acetic acid). After overnight incubation, 5 mL ice cold EtOH was added to precipitate the protein. The precipitate was removed by centrifugation and the supernatant was concentrated by rotary evaporation to 1 mL. The crude solution was applied to a Bio-Gel P-2 column, using 50 mM ABC as eluent. The fractions containing product were collected, lyophilized and used without further purification.

## 10. Chemoenzymatic O-GlcNAc labelling

Cells were lysed in RIPA buffer containing a protease inhibitor cocktail (SIGMA; 2 mL/50 M cells). Lysates were cleared by centrifugation at 5000 x g for 5 min, and then proteins were

precipitated from the supernatant by chloroform/methanol precipitation (add same volume of MeOH, vortex, add half volume of CHCl<sub>3</sub>, vortex and centrifuge; discard top layer, add same volume of H<sub>2</sub>O, vortex, centrifuge and remove all liquid). Protein pellet was suspended the protein in 500  $\mu$ L of 1% SDS in 20 mM HEPES pH 7.9 (heated to 90°C for 5–10 minutes to completely dissolve the proteins). After cooling to RT, enzymatic reaction reagents were added (487  $\mu$ L H<sub>2</sub>O, 1 mL 2.5 labelling buffer containing 125 mM NaCl, 50 mM HEPES, 5% NP-40, pH7.9, 138  $\mu$ L of 100 mM MnCl<sub>2</sub>, 125  $\mu$ L of 5 mM UDP-GalNAz, and 100  $\mu$ L GalT1. The reaction mixture was incubated at 4°C overnight with shaking, after which the proteins were subjected to chloroform/methanol precipitation as described before. The protein pellet was air dried and suspended in 528  $\mu$ L of 1% SDS in 50 mM Tris-HCl, pH 8.0. To complete the click chemistry reaction, 15  $\mu$ L of 10 mM CuSO<sub>4</sub>, 15  $\mu$ L of 20 mM BTTP, 15  $\mu$ L of 5 mM biotin-PEG<sub>4</sub>-alkyne and 30  $\mu$ L of 100 mM Sodium ascorbate were added to the solution, and the reaction mixture was shaken at RT for 2 hrs. Excess reagents were removed by chloroform/methanol protein precipitation, and the pellet was suspended in 400  $\mu$ L 1% SDS/Tris pH 7.5. PNGase F treatment was completed by the addition of 60  $\mu$ L 10% NP-40, 60  $\mu$ L NEB Glycobuffer 2, 15  $\mu$ L PNGaseF, and 65  $\mu$ L H<sub>2</sub>O. The reaction mixture was incubated at 37° overnight, after which the proteins were precipitated with CHCl<sub>3</sub>/MeOH.

## 11. Proteomics

### 11.1 Sample preparation

Chemoenzymatically labelled protein pellets were resuspended in 150  $\mu$ L 4%SDS+10mM EDTA and 1.2 mL 1%Brij97+150mM NaCl+50mM triethylamine. pH 7.4. 50  $\mu$ L of previously blocked streptavidin-agarose beads (blocked in same buffer + 1% BSA for 3 hrs, and subsequently washed 3 times with PBS). Proteins were allowed to bind to the beads for 3 hrs at RT with gentle rotation, after which the suspension was transferred to a filtering column and the beads were washed sequentially with 2 x 2% SDS in PBS, 2x 8M urea in 250 mM ammonium bicarbonate (ABC), 2x 2.5 M NaCl in PBS, 2 x 0.5 M ABC, 2 x 250 mM ABC, 2 x 50 mM ABC. The beads were then suspended in 120  $\mu$ L 8 M urea and 100 mM Tris pH 8.5, and 0.6  $\mu$ L of 1M TCEP was added. The reaction was incubated at RT for 20 min, followed by the addition of 13.2  $\mu$ L of 500 mM 2-chloro-acetamide. The reaction was further incubated for 15 min at RT in the dark, after which the reaction was diluted with 360  $\mu$ L of 100 mM Tris pH 8.5 and 4.8  $\mu$ L of 100 mM CaCl<sub>2</sub>. Trypsin (sequencing grade, 25  $\mu$ g) was added and the reaction was incubated at 37 °C in the dark overnight with gentle shaking. The reaction was then quenched with 27  $\mu$ L of 90% formic acid, and the beads were filtered out of the solution.

### *Dimethyl labeling*

For dimethyl labelling, light, medium and heavy 4% (w/v) formaldehyde solution were first prepared by adding 10 $\mu$ L of CH<sub>2</sub>O (37%), CD<sub>2</sub>O or <sup>13</sup>CD<sub>2</sub>O to 80 $\mu$ L, 40 $\mu$ L and 40 $\mu$ L of water respectively. Light and heavy sodium cyanoborohydride solution (0.6 M) were freshly prepared by adding 0.02g of either NaBH<sub>3</sub>CN (light, MW = 62.84; Arcos Organics 168550100) or NaBD<sub>3</sub>CN (heavy, Sigma-Aldrich 190020-1G) to 500 $\mu$ L water. For the light sample of 100  $\mu$ L, 4  $\mu$ L 4% w/v CH<sub>2</sub>O was added, vortexed, spun down, followed by addition 4  $\mu$ L of 0.6 M NaBH<sub>3</sub>CN, vortexed and spun down. This we labelled as LIGHT, with an expected mass shift of +28.0313. For the medium sample of 100  $\mu$ L, 4  $\mu$ L 4% w/v CD<sub>2</sub>O was added, vortexed, spun down, followed by addition 4  $\mu$ L of 0.6 M NaBH<sub>3</sub>CN, vortexed and spun down. This we labelled as MEDIUM, with an expected mass shift of +32.0564. For the

heavy sample of 100  $\mu$ L, 4  $\mu$ l 4% w/v  $^{13}\text{CD}_2\text{O}$  was added, vortexed, spun down, followed by addition 4  $\mu$ l of 0.6 M NaBD<sub>3</sub>CN, vortexed and spun down. This we labelled as HEAVY, with an expected mass shift of +36.0757. All samples were incubated for 1 hour at room temperature with mild shaking. After incubation, 15  $\mu$ L of 200 mM ammonium bicarbonate was added to quench the reaction, then vortexed and spun down. To each sample, 7  $\mu$ l of 90% FA was added (final conc. of FA = 5%) to further quench the reaction and acidify the samples for mass-spectrometry, vortexed and spun down.

### 11.2. Proteomics acquisition

For sample acquisition, each sample was first loaded to a C18 loading column and washed with 5% acetonitrile in water to remove salts and other interfering chemicals. The sample was then transferred to a custom made C18 analytical column (25cm) using UltiMate 3000 (Dionex) nano pump. Mass spectrometry data was acquired by an Orbitrap Velos (ThermoFischer) instrument using top-20 ions data-dependent acquisition method. The same UltiMate 3000 (Dionex) nano pump was used to provide a 180 minutes gradient of 10%-90% acetonitrile/water solution.

### 11.3 . Proteomics data analysis

The acquired data was converted to ms1 and ms2 and then searched by ProLuCID<sup>12</sup> against Uniprot reference proteome database (mus musculus, 2016-02) with common contaminant proteins and reversed sequence added. All identification results were filtered by 1% protein FDR using previously published method.<sup>12</sup>

#### *Protein quantitation*

For protein quantitation, total peak area for each identified peptide was extracted from the MS1 data using our in-house script. The extracted ion chromatogram (XIC) was then deconvoluted using exponentially-modified gaussian model and the area under curve (AUC) was calculated using the deconvoluted peak parameters. For singletons, i.e. peptide not identified in all three channels (light-control, medium-memory, heavy-effector), peak area was first tried to recover signal from the corresponding channel, and then discarded if not recoverable. The calculated AUC (cAUC) was used to quantify each peptide. For protein quantitation, a weighted median cAUC by total intensity of all unique peptides was used to calculate the protein ratio among control, memory and effector channel. Proteins that have been consistently identified and quantified from all three replicates were reported for the final result.

#### *Confidence score*

For each protein, a confidence score was calculated based on the total spectral count, DeltaCN and XCorr. In short, all peptide identification with an XCorr < average XCorr of background peptide (peptide identified in control and blank) was not used for calculation. With the rest of the peptides, unique peptide was assigned a weight of 1 and shared peptide was assigned a weight of 1/n, n=number of protein sharing this peptide. The weighted sum of DeltaCN (XCorr of the highest identification/second highest identification) by all spectral was then calculated and then divided by total spectral count of each protein to result in a raw confidence score. Raw confidence score was then normalized for all proteins to a scale of 0 to 1.

### *Gene ontology enrichment analysis*

All identified proteins were first converted back to the corresponding gene names from their UniprotID. The gene name was then used as a list with or without the quantitation number for the gene ontology term enrichment analysis by <http://www.enrichnet.org/> (Enrichnet) or <http://geneontology.org/> (PANTHER). The final results were then separated by biological process, molecular function and cellular component to plot into graphs using hierarchical information.

### *Protein correlation analysis and clustering*

For protein correlation analysis, we used STRING database ([www.string-db.org](http://www.string-db.org)) as the reference database protein interaction. A correlation matrix was first generated by calculating the correlation between each protein-protein pair and then clustered by K-mean (As shown in Figure S2). Seven strongly correlated clusters were found from the heatmap, including ATP-binding cluster (P4hb,Acly,Eprs,Cad,Atp5b,Pa2g4,Dnajb1,Ldha,Vars,Cct3), the Histone cluster (Hist1h2br, Hist2h3c2, Hist2h3b, Hist2h2ac, Hist2h2bb, Hist1h2al, Hist1h2bp, Hist1h2bg, Hist1h2bb, Hist1h2bm, Hist1h2bn, Hist1h2bh, Hist1h2bk, H3f3b, Hist2h2aa1, Hist2h2aa2), RNA binding/translation cluster (Rpl18a, Rps15a, Eef1a1, Rps4x, Rpl6, Rpl7, Rpl5, Eif3f, Rpl15, Rps23, Rps10, Rps2, Gm10020), MCM complex cluster (Mcm7, Mcm6, Mcm5, Mcm3) and protein transport/cytoplasmic membrane-bounded vesicle cluster (Hsp90ab1, Ywhaq, Ywhah, Ywhag, Hsp90aa1, Ywhab, Ywhae).

## References

- (1) Lopez Aguilar, A., Hou, X., Wen, L., Wang, P. G., and Wu, P. (2017) A chemoenzymatic histology method for O-GlcNAc detection. *ChemBioChem*.
- (2) Lund, P. J., Elias, J. E., and Davis, M. M. (2016) Global Analysis of O-GlcNAc Glycoproteins in Activated Human T Cells. *J. Immunol.* *197*, 3086–3098.
- (3) Wells, L., Vosseller, K., Cole, R. N., Cronshaw, J. M., Matunis, M. J., and Hart, G. W. (2002) Mapping Sites of O-GlcNAc Modification Using Affinity Tags for Serine and Threonine Post-translational Modifications. *Mol. Cell. Proteomics* *1*, 791–804.
- (4) Khidekel, N., Ficarro, S. B., Peters, E. C., and Hsieh-Wilson, L. C. (2004) Exploring the O-GlcNAc proteome: direct identification of O-GlcNAc-modified proteins from the brain. *Proc. Natl. Acad. Sci.* *101*, 13132–13137.
- (5) Nagel, A. K., Schilling, M., Comte-Walters, S., Berkaw, M. N., and Ball, L. E. (2013) Identification of O-Linked N-Acetylglucosamine (O-GlcNAc)-modified Osteoblast Proteins by Electron Transfer Dissociation Tandem Mass Spectrometry Reveals Proteins Critical for Bone Formation. *Mol. Cell. Proteomics* *12*, 945–955.
- (6) Trinidad, J. C., Barkan, D. T., Gulledge, B. F., Thalhammer, A., Sali, A., Schoepfer, R., and Burlingame, A. L. (2012) Global Identification and Characterization of Both O-GlcNAcylation and Phosphorylation at the Murine Synapse. *Mol. Cell. Proteomics* *11*, 215–229.
- (7) Hahne, H., Sobotzki, N., Nyberg, T., Helm, D., Borodkin, V. S., van Aalten, D. M. F., Agnew, B., Kuster, B., Aalten, D. M. F. Van, Agnew, B., and Kuster, B. (2013) Proteome Wide Purification and Identification of O-GlcNAc-Modified Proteins Using Click Chemistry and Mass Spectrometry. *J. Prot. Res* *12*, 927–36.
- (8) Jiang, H., Zheng, T., Lopez-Aguilar, A., Feng, L., Kopp, F., Marlow, F. L., and Wu, P. (2014) Monitoring Dynamic Glycosylation in Vivo Using Supersensitive Click Chemistry. *Bioconjug. Chem.* *25*, 698–706.
- (9) Thannhauser, T. W., Konishi, Y., and Scheraga, H. A. (1984) Sensitive quantitative analysis of disulfide bonds in polypeptides and proteins. *Anal. Biochem.* *138*, 181–188.
- (10) Xue, M., Guan, W., Zou, Y., Fang, J., Liu, X. W., Wang, P. G., and Wang, F. (2012) Investigation of the nucleotide triphosphate substrate specificity of Homo sapiens UDP-N-acetylgalactosamine pyrophosphorylase (AGX1). *Bioorganic Med. Chem. Lett.* *22*, 3957–3961.
- (11) Nishimoto, M., and Kitaoka, M. (2007) Identification of N-acetylhexosamine 1-kinase in the complete lacto-N-biose I/galacto-N-biose metabolic pathway in *Bifidobacterium longum*. *Appl. Environ. Microbiol.* *73*, 6444–6449.
- (12) Xu, T., Park, S. K., Venable, J. D., Wohlschlegel, J. A., Diedrich, J. K., Cociorva, D., Lu, B., Liao, L., Hewel, J., Han, X., Wong, C. C. L., Fonslow, B., Delahunty, C., Gao, Y., Shah, H., and Yates, J. R. (2015) ProLuCID: An improved SEQUEST-like algorithm with enhanced sensitivity and specificity. *J. Proteomics* *129*, 16–24.
